# Supplementary material for: The importance of the counter-cation in reductive rare-earth metal chemistry: 18-crown-6 instead of 2,2,2-cryptand allows isolation of [YII(NR2)3]1− and ynediolate and enediolate complexes from CO reactions
Source: PubMed Central journal article supplement — Chem Sci. 2020 Jan 11;11(7):2006–14. doi: 10.1039/c9sc05794c (PMC8150099; doi:10.1039/c9sc05794c), 2020-01-11
Supplement: SC-011-C9SC05794C-s002.pdf [file SC-011-C9SC05794C-s002.pdf]

## Table of Contents

### Contents

|                                                                        |    |
|------------------------------------------------------------------------|----|
| Table of Contents .....                                                | 1  |
| X-ray Data Collection, Structure, Solution, Refinement .....           | 3  |
| 1-Gd in R32. ....                                                      | 3  |
| Figure S1 .....                                                        | 4  |
| 2-Dy. ....                                                             | 4  |
| Figure S2 .....                                                        | 5  |
| 2-Er .....                                                             | 5  |
| Figure S3 .....                                                        | 7  |
| 2-Tb,.....                                                             | 7  |
| 2-Y.....                                                               | 7  |
| Figure S4 .....                                                        | 8  |
| 2-Tm.....                                                              | 8  |
| Figure S5. ....                                                        | 9  |
| 2-Gd.....                                                              | 9  |
| Figure S6 .....                                                        | 10 |
| 2-Ho. ....                                                             | 10 |
| Figure S7 .....                                                        | 11 |
| 3-Dy. ....                                                             | 11 |
| 3-Ho. ....                                                             | 12 |
| Figure S8 .....                                                        | 13 |
| 3-Tm.....                                                              | 13 |
| Figure S9 .....                                                        | 14 |
| Figure S10 .....                                                       | 15 |
| 4- Gd. ....                                                            | 15 |
| Table S1. Crystal data and structure refinement for ajr19 (2-Dy). .... | 16 |
| Table S2. Bond lengths [Å] for ajr19(2-Dy).....                        | 17 |
| Table S3. Crystal data and structure refinement for ajr20 (2-Er). .... | 18 |
| Table S4. Bond lengths [Å] for ajr20(2-Er). ....                       | 20 |
| Table S5. Crystal data and structure refinement for ajr23(2-Tb).....   | 21 |
| Table S6. Bond lengths [Å] for ajr23 (2-Tb).....                       | 23 |

|                                                                               |    |
|-------------------------------------------------------------------------------|----|
| Table S7. Crystal data and structure refinement for ajr28 (2-Y).....          | 24 |
| Table S8. Bond lengths [Å] for ajr28 (2-Y).....                               | 25 |
| Table S9. Crystal data and structure refinement for ajr29 (2-Tm).....         | 26 |
| Table S10. Bond lengths [Å] for ajr29 (2-Tm).....                             | 28 |
| Table S11. Crystal data and structure refinement for ajr40 (2-Gd).....        | 29 |
| Table S12. Bond lengths [Å] for ajr40(2-Gd).....                              | 31 |
| Table S13. Crystal data and structure refinement for ajr43 (2-Ho).....        | 32 |
| Table S14. Bond lengths [Å] for ajr43 (2-Ho).....                             | 33 |
| Table S15. Crystal data and structure refinement for ajr15 (3-Dy).....        | 35 |
| Table S16. Bond lengths [Å] for ajr15 (3-Dy).....                             | 36 |
| Table S17. Crystal data and structure refinement for ajr26 (3-Ho).....        | 38 |
| Table S18. Bond lengths [Å] for ajr26 (3-Ho).....                             | 39 |
| Table S19. Crystal data and structure refinement for ajr41 (3-Tm).....        | 42 |
| Table S20. Bond lengths [Å] ajr41 (3-Tm).....                                 | 44 |
| Table S21. Crystal data and structure refinement for ajr32 (4-Gd).....        | 47 |
| Table S22. Bond lengths [Å] for ajr32 (4-Gd).....                             | 48 |
| Table S23. Crystal data and structure refinement for ajr46 (1-Gd).....        | 51 |
| Table S24. Bond lengths [Å] and angles [°] for ajr46 (1-Gd).....              | 53 |
| UV-Visible spectra .....                                                      | 57 |
| Figure S11. UV-visible spectrum of 2-Gd in Et <sub>2</sub> O .....            | 57 |
| Figure S12. UV-visible spectrum of 2-Dy in Et <sub>2</sub> O .....            | 57 |
| Figure S13. UV-visible spectrum of 2-Tb in Et <sub>2</sub> O.....             | 58 |
| Figure S14. UV-visible spectrum of 2-Ho in Et <sub>2</sub> O .....            | 58 |
| Figure S15. UV-visible spectrum of 2-Y in Et <sub>2</sub> O.....              | 59 |
| Figure S16. UV-visible spectrum of 2-Er in Et <sub>2</sub> O .....            | 59 |
| Figure S17. UV-visible spectrum of 2-Tm in Et <sub>2</sub> O.....             | 60 |
| Figure S18. Decomposition of 1-Dy 3mM in THF .....                            | 60 |
| Figure S19. Decomposition of 2-Dy 3mM in Et <sub>2</sub> O.....               | 61 |
| H-Tube Schematic.....                                                         | 61 |
| Figure S20. Schematic of H tube used in reactions to form 3-Ln and 4-Ln ..... | 61 |

## X-ray Data Collection, Structure, Solution, Refinement

### 1-Gd in R32.

X-ray Data Collection, Structure Solution and Refinement for ajr46.

A blue crystal of approximate dimensions 0.283 x 0.106 x 0.103 mm was mounted in a cryoloop and transferred to a Bruker SMART APEX II diffractometer. The APEX2<sup>1</sup> program package was used to determine the unit-cell parameters and for data collection (240 sec/frame scan time for a sphere of diffraction data). The raw frame data was processed using SAINT<sup>2</sup> and SADABS<sup>3</sup> to yield the reflection data file. Subsequent calculations were carried out using the SHELXTL<sup>4</sup> program. The systematic absences were consistent with the trigonal space group *R32*. The non-centrosymmetric space group *R32* was assigned and later determined to be correct.

The structure was solved by direct methods and refined on  $F^2$  by full-matrix least-squares techniques. The analytical scattering factors<sup>5</sup> for neutral atoms were used throughout the analysis.

Hydrogen atoms were included using a riding model.

Least-squares analysis yielded  $wR2 = 0.0426$  and  $Goof = 1.005$  for 88 variables refined against 2478 data (0.80 Å),  $R1 = 0.0235$  for those 2264 data with  $I > 2.0\sigma(I)$ .

There were several high residuals present in the final difference-Fourier map. It was not possible to determine the nature of the residuals although it was probable that toluene solvent was present. The SQUEEZE<sup>7a</sup> routine in the PLATON<sup>7b</sup> program package was used to account for the electrons in the solvent accessible voids.

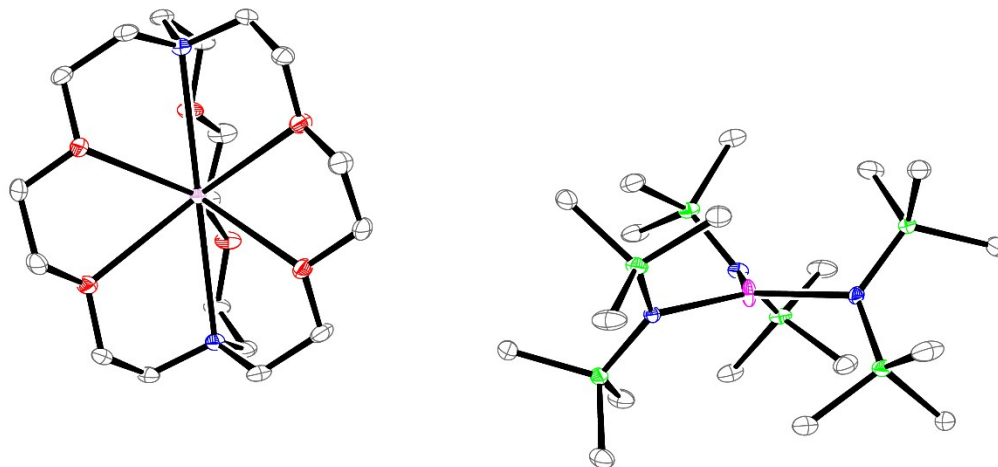

**Figure S1.** Ortep representation of **1-Gd** in R32 space group. Thermal ellipsoids drawn at the 50% probability level. H atoms excluded for clarity.

**2-Dy.** X-ray Data Collection, Structure Solution and Refinement for ajr19.

A dark blue crystal of approximate dimensions 0.140 x 0.145 x 0.192 mm was mounted in a cryoloop and transferred to a Bruker SMART APEX II diffractometer. The APEX2<sup>1</sup> program package was used to determine the unit-cell parameters and for data collection (60 sec/frame scan time for a sphere of diffraction data). The raw frame data was processed using SAINT<sup>2</sup> and SADABS<sup>3</sup> to yield the reflection data file. Subsequent calculations were carried out using the SHELXTL<sup>4</sup> program. The diffraction symmetry was  $2/m$  and the systematic absences were consistent with the monoclinic space group  $P2_1/n$  that was later determined to be correct.

The structure was solved by dual space methods and refined on  $F^2$  by full-matrix least-squares techniques. The analytical scattering factors<sup>5</sup> for neutral atoms were used throughout the analysis.

Hydrogen atoms were included using a riding model. Several atoms were disordered and included using multiple components, partial site-occupancy factors and isotropic thermal parameters. The Dy metal center was disordered over two positions and modeled with 95 and 5% occupancy.

At convergence,  $wR2 = 0.1025$  and  $Goof = 1.023$  for 553 variables refined against 16185 data ( $0.73\text{\AA}$ ),  $R1 = 0.0426$  for those 12098 data with  $I > 2.0\sigma(I)$ .

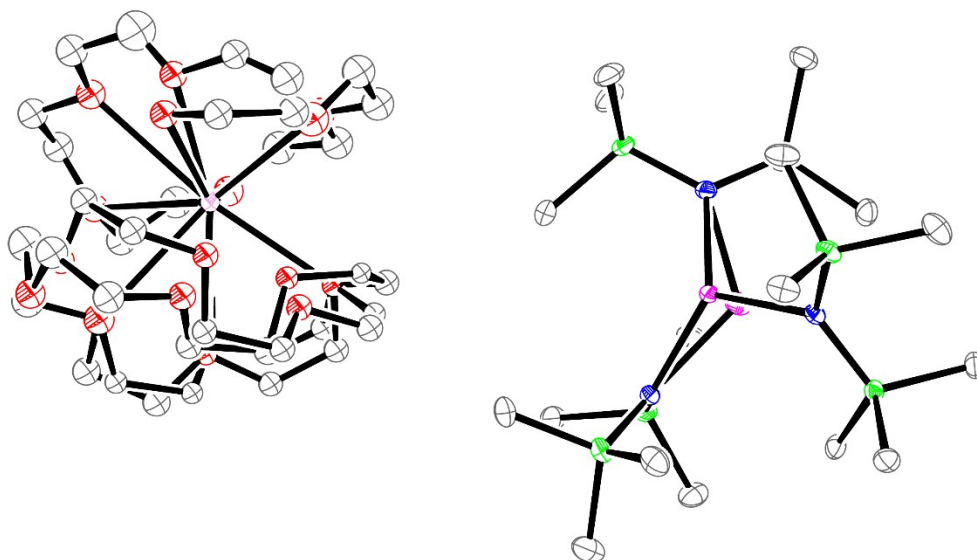

**Figure S2.** Ortep representation of **2-Dy** with thermal ellipsoids drawn at the 50% probability level. Hydrogen atoms excluded for clarity.

#### **2-Er** X-ray Data Collection, Structure Solution and Refinement for ajr20.

A dark blue crystal of approximate dimensions  $0.252 \times 0.229 \times 0.205$  mm was mounted in a cryoloop and transferred to a Bruker SMART APEX II diffractometer. The APEX2<sup>1</sup> program package was used to determine the unit-cell parameters and for data collection (60 sec/frame scan time for a sphere of diffraction data). The raw frame data was processed using SAINT<sup>2</sup> and

SADABS<sup>3</sup> to yield the reflection data file. Subsequent calculations were carried out using the SHELXTL<sup>4</sup> program. The diffraction symmetry was  $2/m$  and the systematic absences were consistent with the monoclinic space group  $P2_1/n$  that was later determined to be correct.

The structure was solved by dual space methods and refined on  $F^2$  by full-matrix least-squares techniques. The analytical scattering factors<sup>5</sup> for neutral atoms were used throughout the analysis. Hydrogen atoms were included using a riding model. Several atoms were disordered and included using multiple components, partial site-occupancy factors and isotropic thermal parameters. The Er metal center was disordered over two positions and modeled with 97 and 3% occupancy.

Least-squares analysis yielded  $wR2 = 0.1081$  and  $Goof = 1.091$  for 553 variables refined against 15353 data (0.74,  $R1 = 0.0496$  for those 12133 data with  $I > 2.0\sigma(I)$ ).

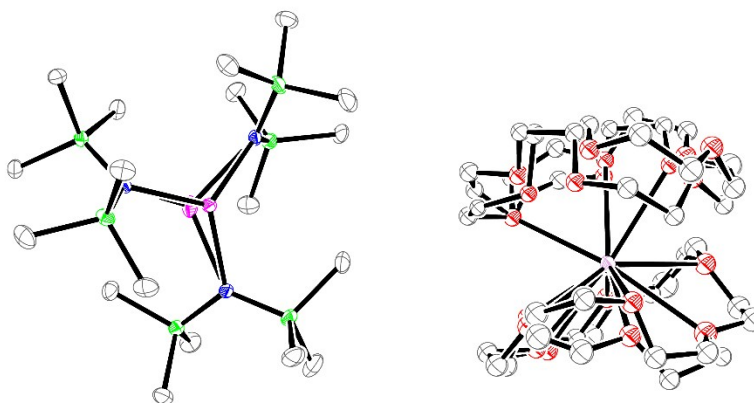

**Figure S3.** Ortep representation of **2-Er** with thermal ellipsoids drawn at the 50% probability level. Hydrogen atoms excluded for clarity

#### **2-Tb,** X-ray Data Collection, Structure Solution and Refinement for ajr23.

A dark blue crystal of approximate dimensions 0.348 x 0.228 x 0.227 mm was in a cryoloop and transferred to a Bruker SMART APEX II diffractometer. The APEX2<sup>1</sup> program package was used to determine the unit-cell parameters and for data collection (30 sec/frame scan time for a sphere of diffraction data). The raw frame data was processed using SAINT<sup>2</sup> and SADABS<sup>3</sup> to yield the reflection data file. Subsequent calculations were carried out using the SHELXTL<sup>4</sup> program. The diffraction symmetry was  $2/m$  and the systematic absences were consistent with the monoclinic space group  $P2_1/n$  that was later determined to be correct.

The structure was solved by dual space methods and refined on  $F^2$  by full-matrix least-squares techniques. The analytical scattering factors<sup>5</sup> for neutral atoms were used throughout the analysis. Hydrogen atoms were included using a riding model. Several atoms were disordered and included using multiple components, partial site-occupancy factors and isotropic thermal parameters.

Least-squares analysis yielded  $wR2 = 0.0855$  and  $Goof = 1.024$  for 544 variables refined against 16174 data ( $0.73\text{\AA}$ ),  $R1 = 0.0356$  for those 13695 data with  $I > 2.0\sigma(I)$ .

#### **2-Y.** X-ray Data Collection, Structure Solution and Refinement for ajr28.

A dark blue crystal of approximate dimensions 0.348 x 0.228 x 0.227 mm was mounted on a in a cryoloop and transferred to a Bruker SMART APEX II diffractometer. The APEX2<sup>1</sup> program package was used to determine the unit-cell parameters and for data collection (90 sec/frame scan time for a sphere of diffraction data). The raw frame data was processed using SAINT<sup>2</sup> and SADABS<sup>3</sup> to yield the reflection data file. Subsequent calculations were carried out using the SHELXTL<sup>4</sup> program. The diffraction symmetry was  $2/m$  and the systematic absences were consistent with the monoclinic space group  $P2_1/n$  that was later determined to be correct.

The structure was solved by dual space methods and refined on  $F^2$  by full-matrix least-squares techniques. The analytical scattering factors<sup>5</sup> for neutral atoms were used throughout the analysis.

Hydrogen atoms were included using a riding model. Disorder in the 18-crown-6 units was modeled isotropically with multiple components. Disorder in the Y metal center was modeled in two parts with 97% and 3% occupancies.

Least-squares analysis yielded  $wR2 = 0.1383$  and  $Goof = 1.025$  for 553 variables refined against

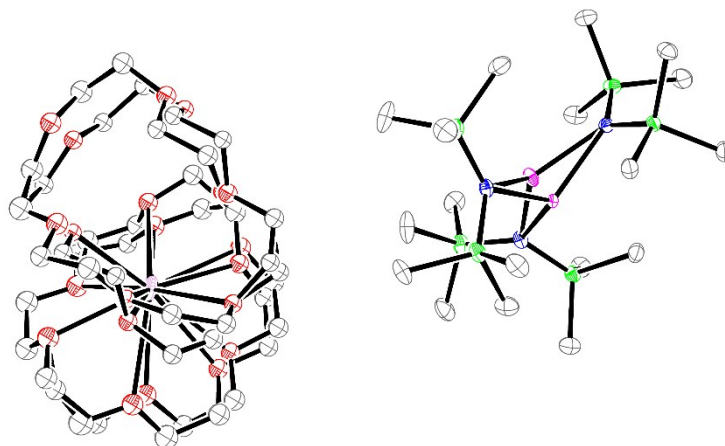

15678 data (0.73 Å),  $R1 = 0.0516$  for those 12476 data with  $I > 2.0\sigma(I)$ .

**Figure S4.** Ortep representation of **2-Y** with thermal ellipsoids drawn at the 50% probability level. Hydrogen atoms excluded for clarity



## 2-Tm. X-ray Data Collection, Structure Solution and Refinement for ajr29.

A purple crystal of approximate dimensions 0.262 x 0.217 x 0.163 mm was mounted in a cryoloop and transferred to a Bruker SMART APEX II diffractometer. The APEX2<sup>1</sup> program package was used to determine the unit-cell parameters and for data collection (90 sec/frame scan time for a sphere of diffraction data). The raw frame data was processed using SAINT<sup>2</sup> and SADABS<sup>3</sup> to yield the reflection data file. Subsequent calculations were carried out using the SHELXTL<sup>4</sup> program. The diffraction symmetry was *mmm* and the systematic absences were consistent with the orthorhombic space group *P2<sub>1</sub>2<sub>1</sub>2<sub>1</sub>* that was later determined to be correct.

The structure was solved by dual space methods and refined on  $F^2$  by full-matrix least-squares techniques. The analytical scattering factors<sup>5</sup> for neutral atoms were used throughout the analysis. Hydrogen atoms were included using a riding model.

Least-squares analysis yielded  $wR2 = 0.1048$  and  $Goof = 1.009$  for 1042 variables refined against 26235 data (0.73Å),  $R1 = 0.0522$  for those 18684 with  $I > 2.0\sigma(I)$ .

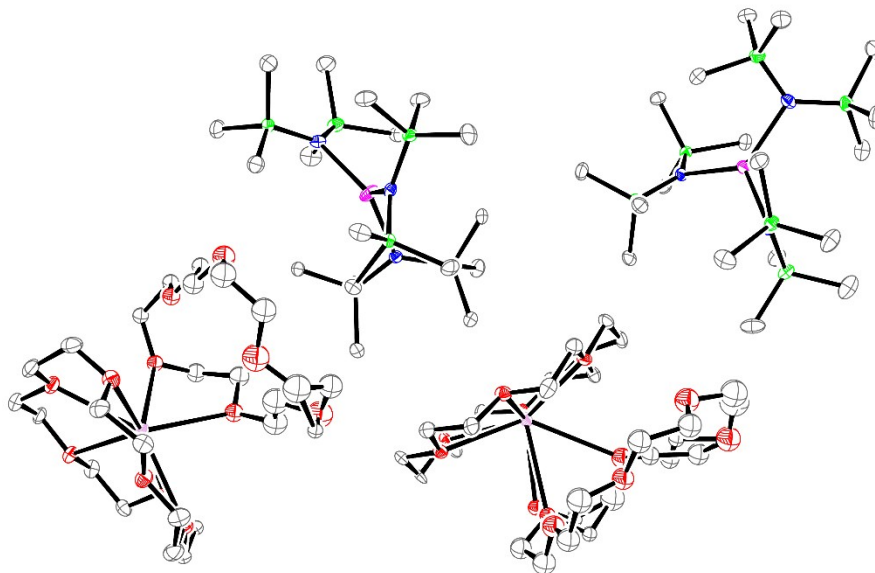

**Figure S5.** Ortep representation of **2-Tm** with thermal ellipsoids drawn at the 50% probability level. Hydrogen atoms excluded for clarity.

## 2-Gd. X-ray Data Collection, Structure Solution and Refinement for ajr40.

A dark blue crystal of approximate dimensions 0.253 x 0.239 x 0.192 mm was mounted in a cryoloop and transferred to a Bruker SMART APEX II diffractometer. The APEX2<sup>1</sup> program package was used to determine the unit-cell parameters and for data collection (90 sec/frame scan time for a sphere of diffraction data). The raw frame data was processed using SAINT<sup>2</sup> and SADABS<sup>3</sup> to yield the reflection data file. Subsequent calculations were carried out using the SHELXTL<sup>4</sup> program. The diffraction symmetry was  $2/m$  and the systematic absences were consistent with the monoclinic space group  $P2_1/n$  that was later determined to be correct.

The structure was solved by dual space methods and refined on  $F^2$  by full-matrix least-squares techniques. The analytical scattering factors<sup>5</sup> for neutral atoms were used throughout the analysis.

Hydrogen atoms were included using a riding model.

Least-squares analysis yielded  $wR2 = 0.0953$  and  $Goof = 1.100$  for 544 variables refined against 16163 data ( $0.73\text{\AA}$ ),  $R1 = 0.0466$  for those 13374 data with  $I > 2.0\sigma(I)$ .

**Figure S6.** Ortep representation of **2-Gd** with thermal ellipsoids drawn at the 50% probability

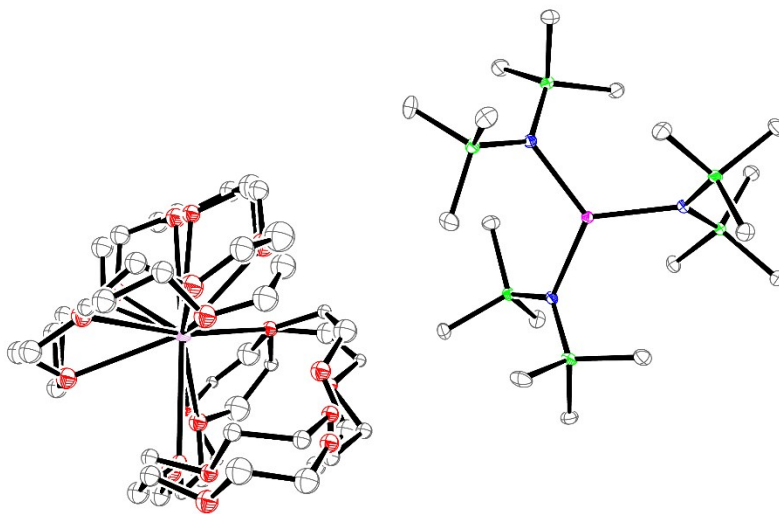

level. Hydrogen atoms excluded for clarity.

**2-Ho.** X-ray Data Collection, Structure Solution and Refinement for ajr43.

A blue crystal of approximate dimensions 0.378 x 0.375 x 0.367 mm was mounted in a cryoloop and transferred to a Bruker SMART APEX II diffractometer. The APEX2<sup>1</sup> program package was used to determine the unit-cell parameters and for data collection (20 sec/frame scan time for a sphere of diffraction data). The raw frame data was processed using SAINT<sup>2</sup> and SADABS<sup>3</sup> to yield the reflection data file. Subsequent calculations were carried out using the SHELXTL<sup>4</sup> program. The diffraction symmetry was  $2/m$  and the systematic absences were consistent with the monoclinic space group  $P2_1/n$  that was later determined to be correct.

The structure was solved by direct methods and refined on  $F^2$  by full-matrix least-squares techniques. The analytical scattering factors<sup>5</sup> for neutral atoms were used throughout the analysis. Hydrogen atoms were included using a riding model.

Least-squares analysis yielded  $wR2 = 0.0914$  and  $Goof = 1.028$  for 553 variables refined against 156608 data (0.74Å),  $R1 = 0.0368$  for those 14019 data with  $I > 2.0\sigma(I)$ .

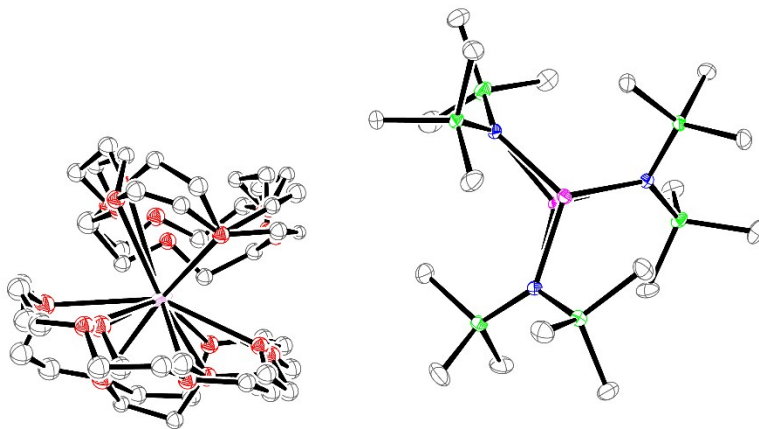

**Figure S7.** Ortep representation of **2-Ho** with thermal ellipsoids drawn at the 50% probability level. Hydrogen atoms excluded for clarity.

### **3-Dy.** X-ray Data Collection, Structure Solution and Refinement for ajr15.

A colorless crystal of approximate dimensions 0.048 x 0.141 x 0.264 mm was mounted in a cryoloop and transferred to a Bruker SMART APEX II diffractometer. The APEX2<sup>1</sup> program

package was used to determine the unit-cell parameters and for data collection (30 sec/frame scan time for a sphere of diffraction data). The raw frame data was processed using SAINT<sup>2</sup> and SADABS<sup>3</sup> to yield the reflection data file. Subsequent calculations were carried out using the SHELXTL<sup>4</sup> program. The diffraction symmetry was  $2/m$  and the systematic absences were consistent with the monoclinic space groups  $Cc$  and  $C2/c$ . It was later determined that space group  $C2/c$  was correct.

The structure was solved by dual space methods and refined on  $F^2$  by full-matrix least-squares techniques. The analytical scattering factors<sup>5</sup> for neutral atoms were used throughout the analysis.

Hydrogen atoms were included using a riding model. The molecule was dimeric. There was a half-molecule located about an inversion center. Disorder in an Et<sub>2</sub>O solvent molecule was modeled isotropically.

Least-squares analysis yielded  $wR2 = 0.0846$  and  $Goof = 1.113$  for 567 variables refined against 15305 data (0.73 Å),  $R1 = 0.0373$  for those 10683 data with  $I > 2.0\sigma(I)$ .

### **3-Ho.** X-ray Data Collection, Structure Solution and Refinement for ajr26.

A yellow crystal of approximate dimensions 0.347 x 0.202 x 0.132 mm was mounted in a cryoloop and transferred to a Bruker SMART APEX II diffractometer. The APEX2<sup>1</sup> program package was used to determine the unit-cell parameters and for data collection (30 sec/frame scan time for a sphere of diffraction data). The raw frame data was processed using SAINT<sup>2</sup> and SADABS<sup>3</sup> to yield the reflection data file. Subsequent calculations were carried out using the SHELXTL<sup>4</sup> program. The diffraction symmetry was  $2/m$  and the systematic absences were consistent with the monoclinic space groups  $Cc$  and  $C2/c$ . It was later determined that space group  $C2/c$  was correct.

The structure was solved by dual space methods and refined on  $F^2$  by full-matrix least-squares techniques. The analytical scattering factors<sup>5</sup> for neutral atoms were used throughout the analysis.

Hydrogen atoms were included using a riding model. The molecule was dimeric. There was a half-molecule located about an inversion center. Disorder in an Et<sub>2</sub>O solvent molecule was modeled isotropically in multiple parts.

Least-squares analysis yielded  $wR2 = 0.0590$  and  $Goof = 1.026$  for 559 variables refined against 14710 data ( $0.70 \text{ \AA}$ ),  $R1 = 0.0251$  for those 12462 data with  $I > 2.0\sigma(I)$ .

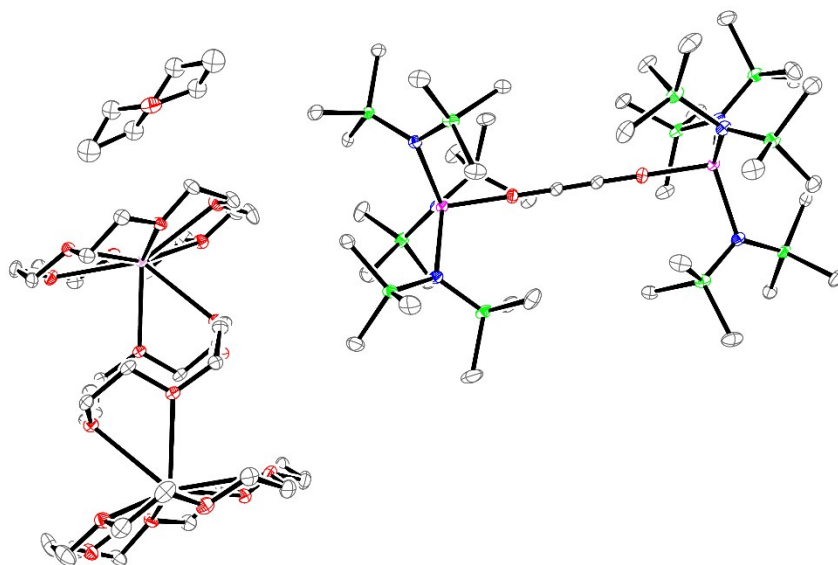

**Figure S8.** Ortep representation of **3-Ho** with thermal ellipsoids drawn at the 50% probability level. Hydrogen atoms excluded for clarity.

### **3-Tm.** X-ray Data Collection, Structure Solution and Refinement for ajr41

A colorless crystal of approximate dimensions  $0.214 \times 0.200 \times 0.196 \text{ mm}$  was mounted in a cryoloop and transferred to a Bruker SMART APEX II diffractometer. The APEX2<sup>1</sup> program package was used to determine the unit-cell parameters and for data collection (60 sec/frame scan time for a sphere of diffraction data). The raw frame data was processed using SAINT<sup>2</sup> and SADABS<sup>3</sup> to yield the reflection data file. Subsequent calculations were carried out using the SHELXTL<sup>4</sup> program. The diffraction symmetry was  $2/m$  and the systematic absences were consistent with the monoclinic space groups  $Cc$  and  $C2/c$ . It was later determined that space group  $C2/c$  was correct.

The structure was solved by dual space methods and refined on  $F^2$  by full-matrix least-squares techniques. The analytical scattering factors<sup>5</sup> for neutral atoms were used throughout the analysis. The molecule was dimeric. There was a half-molecules located about an inversion center. Disorder

in an Et<sub>2</sub>O solvent molecule was modeled isotropically. Hydrogen atoms were included using a riding model.

Least-squares analysis yielded  $wR2 = 0.0554$  and  $Goof = 1.011$  for 559 variables refined against 15214 data ( $0.73\text{\AA}$ ),  $R1 = 0.0244$  for those 12794 data with  $I > 2.0\sigma(I)$ .

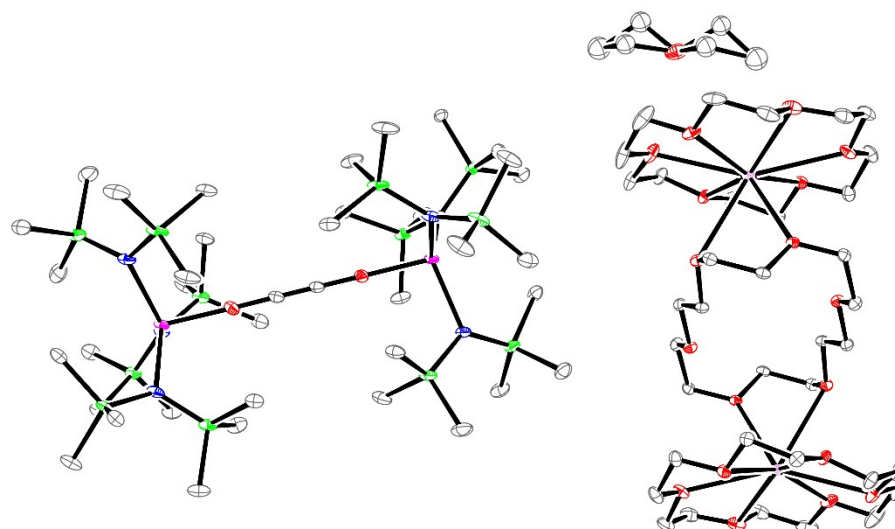

**Figure S9.** Ortep representation of **3-Tm** with thermal ellipsoids drawn at the 50% probability level. Hydrogen atoms excluded for clarity.

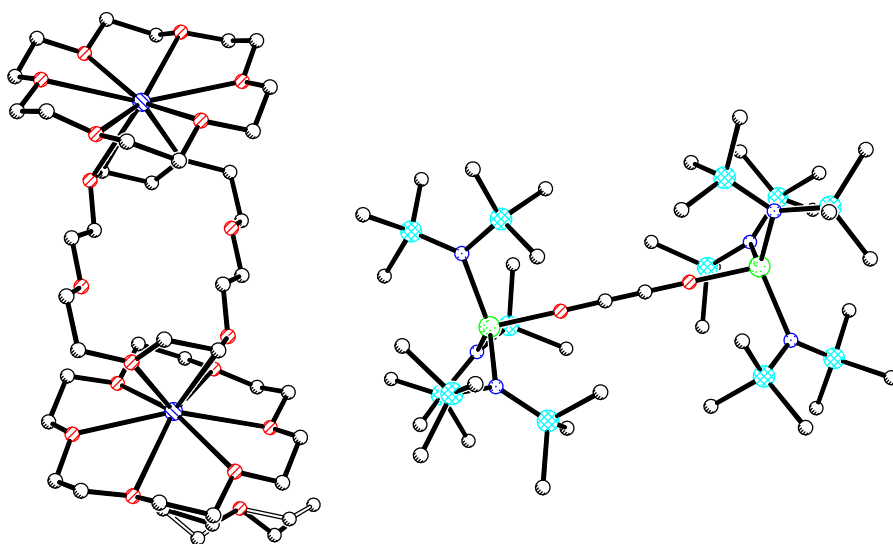

**Figure S10.** Ball and stick representation of connectivity structure of **3-Gd**. Hydrogen atoms excluded for clarity.

#### **4- Gd.** X-ray Data Collection, Structure Solution and Refinement for ajr32.

A colorless crystal of approximate dimensions 0.241 x 0.127 x 0.119 mm was mounted in a cryoloop and transferred to a Bruker SMART APEX II diffractometer. The APEX2<sup>1</sup> program package was used to determine the unit-cell parameters and for data collection (90 sec/frame scan time for a sphere of diffraction data). The raw frame data was processed using SAINT<sup>2</sup> and SADABS<sup>3</sup> to yield the reflection data file. Subsequent calculations were carried out using the SHELXTL<sup>4</sup> program. There were no systematic absences nor any diffraction symmetry other than the Friedel condition. The centrosymmetric triclinic space group  $P\bar{1}$  was assigned and later determined to be correct.

The structure was solved by dual space methods and refined on  $F^2$  by full-matrix least-squares techniques. The analytical scattering factors<sup>5</sup> for neutral atoms were used throughout the analysis.

Hydrogen atoms were included using a riding model.

Least-squares analysis yielded  $wR2 = 0.0672$  and  $Goof = 0.989$  for 769 variables refined against 19003 data ( $0.70 \text{ \AA}$ ),  $R1 = 0.0332$  for those 14746 data with  $I > 2.0\sigma(I)$ .

**Table S1. Crystal data and structure refinement for ajr19 (2-Dy).**

|                                         |                                                                    |                                |
|-----------------------------------------|--------------------------------------------------------------------|--------------------------------|
| Identification code                     | ajr19                                                              |                                |
| Empirical formula                       | C42 H102 Dy K N3 O12 Si6                                           |                                |
| Formula weight                          | 1211.40                                                            |                                |
| Temperature                             | 133(2) K                                                           |                                |
| Wavelength                              | 0.71073 $\text{\AA}$                                               |                                |
| Crystal system                          | Monoclinic                                                         |                                |
| Space group                             | P2 <sub>1</sub> /n                                                 |                                |
| Unit cell dimensions                    | $a = 11.0616(10) \text{ \AA}$                                      | $\alpha = 90^\circ$ .          |
|                                         | $b = 27.199(2) \text{ \AA}$                                        | $\beta = 103.8855(12)^\circ$ . |
|                                         | $c = 21.7721(19) \text{ \AA}$                                      | $\gamma = 90^\circ$ .          |
| Volume                                  | 6359.0(10) $\text{\AA}^3$                                          |                                |
| Z                                       | 4                                                                  |                                |
| Density (calculated)                    | 1.265 $\text{Mg/m}^3$                                              |                                |
| Absorption coefficient                  | 1.403 $\text{mm}^{-1}$                                             |                                |
| F(000)                                  | 2560                                                               |                                |
| Crystal color                           | blue                                                               |                                |
| Crystal size                            | 0.348 x 0.228 x 0.227 $\text{mm}^3$                                |                                |
| Theta range for data collection         | 1.781 to 29.158 $^\circ$                                           |                                |
| Index ranges                            | -14 $\leq h \leq 15$ , -36 $\leq k \leq 37$ , -28 $\leq l \leq 28$ |                                |
| Reflections collected                   | 78631                                                              |                                |
| Independent reflections                 | 16185 [R(int) = 0.0587]                                            |                                |
| Completeness to theta = 25.500 $^\circ$ | 100.0 %                                                            |                                |
| Absorption correction                   | Semi-empirical from equivalents                                    |                                |



|                                            |                                             |
|--------------------------------------------|---------------------------------------------|
| Max. and min. transmission                 | 0.4319 and 0.3886                           |
| Refinement method                          | Full-matrix least-squares on F <sup>2</sup> |
| Data / restraints / parameters             | 16185 / 0 / 553                             |
| Goodness-of-fit on F <sup>2</sup>          | 1.023                                       |
| Final R indices [I>2sigma(I) = 12098 data] | R1 = 0.0426, wR2 = 0.0928                   |
| R indices (all data, 0.73 Å)               | R1 = 0.0678, wR2 = 0.1025                   |
| Extinction coefficient                     | n/a                                         |
| Largest diff. peak and hole                | 1.467 and -0.704 e.Å <sup>-3</sup>          |

**Table S2. Bond lengths [Å] for ajr19(2-Dy).**

---

|             |            |
|-------------|------------|
| Dy(1)-N(3)  | 2.273(3)   |
| Dy(1)-N(2)  | 2.278(3)   |
| Dy(1)-N(1)  | 2.288(3)   |
| Dy(1)-Si(5) | 3.3919(10) |
| Dy(1)-Si(3) | 3.3929(10) |
| Dy(1)-Si(1) | 3.4012(10) |
| Dy(2)-N(1)  | 2.257(5)   |
| Dy(2)-N(3)  | 2.320(5)   |
| Dy(2)-N(2)  | 2.337(5)   |
| Dy(2)-C(5)  | 2.973(6)   |
| Dy(2)-Si(2) | 3.136(4)   |
| Dy(2)-Si(4) | 3.218(4)   |
| Dy(2)-Si(6) | 3.241(4)   |
| Si(1)-N(1)  | 1.714(3)   |
| Si(1)-C(2)  | 1.874(4)   |

|             |          |
|-------------|----------|
| Si(1)-C(1)  | 1.874(4) |
| Si(1)-C(3)  | 1.878(4) |
| Si(2)-N(1)  | 1.710(3) |
| Si(2)-C(5)  | 1.874(4) |
| Si(2)-C(4)  | 1.877(4) |
| Si(2)-C(6)  | 1.878(4) |
| Si(3)-N(3)  | 1.726(3) |
| Si(3)-C(7)  | 1.870(4) |
| Si(3)-C(8)  | 1.876(4) |
| Si(3)-C(9)  | 1.886(4) |
| Si(4)-N(3)  | 1.708(3) |
| Si(4)-C(11) | 1.879(4) |
| Si(4)-C(10) | 1.882(4) |
| Si(4)-C(12) | 1.883(4) |
| Si(5)-N(2)  | 1.713(3) |
| Si(5)-C(14) | 1.870(4) |
| Si(5)-C(15) | 1.879(4) |
| Si(5)-C(13) | 1.880(4) |
| Si(6)-N(2)  | 1.705(3) |
| Si(6)-C(18) | 1.879(3) |
| Si(6)-C(17) | 1.879(3) |
| Si(6)-C(16) | 1.887(3) |

**Table S3. Crystal data and structure refinement for ajr20 (2-Er).**

Identification code                                  ajr20

|                                 |                                                                                                                                |
|---------------------------------|--------------------------------------------------------------------------------------------------------------------------------|
| Empirical formula               | C42 H102 Er K N3 O12 Si6                                                                                                       |
| Formula weight                  | 1216.16                                                                                                                        |
| Temperature                     | 133(2) K                                                                                                                       |
| Wavelength                      | 0.71073 Å                                                                                                                      |
| Crystal system                  | Monoclinic                                                                                                                     |
| Space group                     | P2 <sub>1</sub> /n                                                                                                             |
| Unit cell dimensions            | a = 11.064(3) Å $\alpha = 90^\circ$ .<br>b = 27.080(6) Å $\beta = 103.991(3)^\circ$ .<br>c = 21.797(5) Å $\gamma = 90^\circ$ . |
| Volume                          | 6337(2) Å <sup>3</sup>                                                                                                         |
| Z                               | 4                                                                                                                              |
| Density (calculated)            | 1.275 Mg/m <sup>3</sup>                                                                                                        |
| Absorption coefficient          | 1.553 mm <sup>-1</sup>                                                                                                         |
| F(000)                          | 2568                                                                                                                           |
| Crystal color                   | blue                                                                                                                           |
| Crystal size                    | 0.348 x 0.228 x 0.227 mm <sup>3</sup>                                                                                          |
| Theta range for data collection | 1.222 to 28.872°                                                                                                               |
| Index ranges                    | -14 ≤ h ≤ 14, -34 ≤ k ≤ 34, -28 ≤ l ≤ 28                                                                                       |
| Reflections collected           | 76237                                                                                                                          |
| Independent reflections         | 15353 [R(int) = 0.0511]                                                                                                        |
| Completeness to theta = 25.500° | 99.9 %                                                                                                                         |
| Absorption correction           | Semi-empirical from equivalents                                                                                                |
| Max. and min. transmission      | 0.7458 and 0.6642                                                                                                              |
| Refinement method               | Full-matrix least-squares on F <sup>2</sup>                                                                                    |
| Data / restraints / parameters  | 15353 / 0 / 553                                                                                                                |

|                                                  |                                    |
|--------------------------------------------------|------------------------------------|
| Goodness-of-fit on $F^2$                         | 1.091                              |
| Final R indices [ $I > 2\sigma(I)$ = 12133 data] | $R1 = 0.0496$ , $wR2 = 0.1012$     |
| R indices (all data, 0.74 Å)                     | $R1 = 0.0703$ , $wR2 = 0.1081$     |
| Extinction coefficient                           | n/a                                |
| Largest diff. peak and hole                      | 1.060 and -0.957 e.Å <sup>-3</sup> |

**Table S4. Bond lengths [Å] for ajr20(2-Er).**

---

|             |            |
|-------------|------------|
| Er(1)-N(3)  | 2.246(3)   |
| Er(1)-N(1)  | 2.249(3)   |
| Er(1)-N(2)  | 2.249(3)   |
| Er(1)-Si(3) | 3.3812(13) |
| Er(1)-Si(1) | 3.3850(12) |
| Er(1)-Si(5) | 3.3856(13) |
| Er(2)-N(1)  | 2.256(8)   |
| Er(2)-N(2)  | 2.289(8)   |
| Er(2)-N(3)  | 2.354(8)   |
| Er(2)-C(5)  | 2.961(9)   |
| Er(2)-Si(2) | 3.119(8)   |
| Er(2)-Si(6) | 3.185(7)   |
| Er(2)-Si(4) | 3.243(8)   |
| Si(1)-N(1)  | 1.708(3)   |
| Si(1)-C(1)  | 1.871(5)   |
| Si(1)-C(2)  | 1.877(5)   |
| Si(1)-C(3)  | 1.882(5)   |
| Si(2)-N(1)  | 1.714(3)   |

|             |          |
|-------------|----------|
| Si(2)-C(5)  | 1.875(4) |
| Si(2)-C(4)  | 1.876(4) |
| Si(2)-C(6)  | 1.877(5) |
| Si(3)-N(3)  | 1.715(3) |
| Si(3)-C(8)  | 1.863(5) |
| Si(3)-C(7)  | 1.870(5) |
| Si(3)-C(9)  | 1.882(5) |
| Si(4)-N(3)  | 1.711(3) |
| Si(4)-C(12) | 1.872(5) |
| Si(4)-C(10) | 1.878(4) |
| Si(4)-C(11) | 1.880(4) |
| Si(5)-N(2)  | 1.709(3) |
| Si(5)-C(14) | 1.872(5) |
| Si(5)-C(15) | 1.875(5) |
| Si(5)-C(13) | 1.880(4) |
| Si(6)-N(2)  | 1.704(3) |
| Si(6)-C(17) | 1.871(4) |
| Si(6)-C(18) | 1.880(4) |
| Si(6)-C(16) | 1.889(4) |

**Table S5. Crystal data and structure refinement for ajr23(2-Tb).**

|                     |                          |
|---------------------|--------------------------|
| Identification code | ajr23                    |
| Empirical formula   | C42 H102 K N3 O12 Si6 Tb |
| Formula weight      | 1207.82                  |
| Temperature         | 133(2) K                 |

|                                          |                                                                                                                                  |
|------------------------------------------|----------------------------------------------------------------------------------------------------------------------------------|
| Wavelength                               | 0.71073 Å                                                                                                                        |
| Crystal system                           | Monoclinic                                                                                                                       |
| Space group                              | P2 <sub>1</sub> /n                                                                                                               |
| Unit cell dimensions                     | a = 11.1324(18) Å $\alpha = 90^\circ$ .<br>b = 27.081(4) Å $\beta = 103.924(2)^\circ$ .<br>c = 21.775(4) Å $\gamma = 90^\circ$ . |
| Volume                                   | 6372.0(18) Å <sup>3</sup>                                                                                                        |
| Z                                        | 4                                                                                                                                |
| Density (calculated)                     | 1.259 Mg/m <sup>3</sup>                                                                                                          |
| Absorption coefficient                   | 1.337 mm <sup>-1</sup>                                                                                                           |
| F(000)                                   | 2556                                                                                                                             |
| Crystal color                            | blue                                                                                                                             |
| Crystal size                             | 0.348 x 0.228 x 0.227 mm <sup>3</sup>                                                                                            |
| Theta range for data collection          | 1.786 to 29.178°                                                                                                                 |
| Index ranges                             | -15 ≤ h ≤ 14, -36 ≤ k ≤ 35, -28 ≤ l ≤ 29                                                                                         |
| Reflections collected                    | 78537                                                                                                                            |
| Independent reflections                  | 16174 [R(int) = 0.0363]                                                                                                          |
| Completeness to theta = 25.500°          | 100.0 %                                                                                                                          |
| Absorption correction                    | Semi-empirical from equivalents                                                                                                  |
| Max. and min. transmission               | 0.4318 and 0.3744                                                                                                                |
| Refinement method                        | Full-matrix least-squares on F <sup>2</sup>                                                                                      |
| Data / restraints / parameters           | 16174 / 0 / 544                                                                                                                  |
| Goodness-of-fit on F <sup>2</sup>        | 1.024                                                                                                                            |
| Final R indices [I > 2σ(I) = 13695 data] | R1 = 0.0356, wR2 = 0.0804                                                                                                        |
| R indices (all data, 0.73 Å)             | R1 = 0.0461, wR2 = 0.0855                                                                                                        |

|                             |                                    |
|-----------------------------|------------------------------------|
| Extinction coefficient      | n/a                                |
| Largest diff. peak and hole | 1.489 and -0.680 e.Å <sup>-3</sup> |

**Table S6. Bond lengths [Å] for ajr23 (2-Tb).**

---

|             |          |
|-------------|----------|
| Tb(1)-N(2)  | 2.291(2) |
| Tb(1)-N(3)  | 2.294(2) |
| Tb(1)-N(1)  | 2.295(2) |
| Si(1)-N(1)  | 1.709(2) |
| Si(1)-C(1)  | 1.875(3) |
| Si(1)-C(3)  | 1.878(3) |
| Si(1)-C(2)  | 1.879(3) |
| Si(2)-N(1)  | 1.709(2) |
| Si(2)-C(5)  | 1.878(3) |
| Si(2)-C(4)  | 1.880(3) |
| Si(2)-C(6)  | 1.880(3) |
| Si(3)-N(3)  | 1.714(2) |
| Si(3)-C(7)  | 1.875(3) |
| Si(3)-C(8)  | 1.876(3) |
| Si(3)-C(9)  | 1.884(3) |
| Si(4)-N(3)  | 1.707(2) |
| Si(4)-C(10) | 1.881(3) |
| Si(4)-C(12) | 1.882(3) |
| Si(4)-C(11) | 1.886(3) |
| Si(5)-N(2)  | 1.711(2) |

|             |          |
|-------------|----------|
| Si(5)-C(14) | 1.878(3) |
| Si(5)-C(13) | 1.881(3) |
| Si(5)-C(15) | 1.886(3) |
| Si(6)-N(2)  | 1.704(2) |
| Si(6)-C(17) | 1.879(3) |
| Si(6)-C(18) | 1.881(3) |
| Si(6)-C(16) | 1.886(3) |

**Table S7. Crystal data and structure refinement for ajr28 (2-Y).**

|                                 |                                          |                   |
|---------------------------------|------------------------------------------|-------------------|
| Identification code             | ajr28                                    |                   |
| Empirical formula               | C42 H102 K N3 O12 Si6 Y                  |                   |
| Formula weight                  | 1137.81                                  |                   |
| Temperature                     | 133(2) K                                 |                   |
| Wavelength                      | 0.71073 Å                                |                   |
| Crystal system                  | Monoclinic                               |                   |
| Space group                     | P2 <sub>1</sub> /n                       |                   |
| Unit cell dimensions            | a = 11.0774(7) Å                         | ∠ = 90°.          |
|                                 | b = 27.0905(18) Å                        | ∠ = 104.0003(9)°. |
|                                 | c = 21.7959(14) Å                        | ∠ = 90°.          |
| Volume                          | 6346.5(7) Å <sup>3</sup>                 |                   |
| Z                               | 4                                        |                   |
| Density (calculated)            | 1.191 Mg/m <sup>3</sup>                  |                   |
| Absorption coefficient          | 1.147 mm <sup>-1</sup>                   |                   |
| F(000)                          | 2452                                     |                   |
| Crystal color                   | violet                                   |                   |
| Crystal size                    | 0.348 x 0.228 x 0.227 mm <sup>3</sup>    |                   |
| Theta range for data collection | 1.221 to 28.909°                         |                   |
| Index ranges                    | -14 ≤ h ≤ 14, -36 ≤ k ≤ 35, -28 ≤ l ≤ 29 |                   |
| Reflections collected           | 76302                                    |                   |
| Independent reflections         | 15678 [R(int) = 0.0364]                  |                   |
| Completeness to theta = 25.500° | 100.0 %                                  |                   |
| Absorption correction           | Semi-empirical from equivalents          |                   |



|                                            |                                             |
|--------------------------------------------|---------------------------------------------|
| Max. and min. transmission                 | 0.7458 and 0.6480                           |
| Refinement method                          | Full-matrix least-squares on F <sup>2</sup> |
| Data / restraints / parameters             | 15678 / 0 / 553                             |
| Goodness-of-fit on F <sup>2</sup>          | 1.026                                       |
| Final R indices [I>2sigma(I) = 12476 data] | R1 = 0.0516, wR2 = 0.1294                   |
| R indices (all data, 0.73 Å)               | R1 = 0.0690, wR2 = 0.1384                   |
| Extinction coefficient                     | n/a                                         |
| Largest diff. peak and hole                | 1.241 and -0.673 e.Å <sup>-3</sup>          |

**Table S8. Bond lengths [Å] for ajr28 (2-Y).**

|            |            |
|------------|------------|
| Y(1)-N(3)  | 2.264(2)   |
| Y(1)-N(2)  | 2.2667(19) |
| Y(1)-N(1)  | 2.271(2)   |
| Y(1)-Si(3) | 3.3992(8)  |
| Y(1)-Si(5) | 3.4012(7)  |
| Y(1)-Si(1) | 3.4019(8)  |
| Y(2)-N(1)  | 2.263(8)   |
| Y(2)-N(2)  | 2.321(8)   |
| Y(2)-N(3)  | 2.368(8)   |
| Y(2)-C(5)  | 2.965(9)   |
| Y(2)-Si(2) | 3.124(8)   |
| Y(2)-Si(6) | 3.218(7)   |
| Y(2)-Si(4) | 3.249(8)   |
| Si(1)-N(1) | 1.708(2)   |
| Si(1)-C(1) | 1.868(3)   |
| Si(1)-C(2) | 1.871(3)   |

|             |          |
|-------------|----------|
| Si(1)-C(3)  | 1.881(4) |
| Si(2)-N(1)  | 1.705(2) |
| Si(2)-C(5)  | 1.872(3) |
| Si(2)-C(6)  | 1.876(3) |
| Si(2)-C(4)  | 1.881(3) |
| Si(3)-N(3)  | 1.713(2) |
| Si(3)-C(8)  | 1.870(3) |
| Si(3)-C(7)  | 1.872(3) |
| Si(3)-C(9)  | 1.881(3) |
| Si(4)-N(3)  | 1.705(2) |
| Si(4)-C(10) | 1.875(3) |
| Si(4)-C(12) | 1.879(3) |
| Si(4)-C(11) | 1.884(3) |
| Si(5)-N(2)  | 1.709(2) |
| Si(5)-C(14) | 1.869(3) |
| Si(5)-C(15) | 1.874(3) |
| Si(5)-C(13) | 1.875(3) |
| Si(6)-N(2)  | 1.701(2) |
| Si(6)-C(17) | 1.875(3) |
| Si(6)-C(18) | 1.876(3) |
| Si(6)-C(16) | 1.883(3) |

**Table S9. Crystal data and structure refinement for ajr29 (2-Tm).**

Identification code ajr29

|                                 |                                                                                                                        |
|---------------------------------|------------------------------------------------------------------------------------------------------------------------|
| Empirical formula               | C <sub>42</sub> H <sub>102</sub> K N <sub>3</sub> O <sub>12</sub> Si <sub>6</sub> Tm                                   |
| Formula weight                  | 1217.83                                                                                                                |
| Temperature                     | 133(2) K                                                                                                               |
| Wavelength                      | 0.71073 Å                                                                                                              |
| Crystal system                  | Orthorhombic                                                                                                           |
| Space group                     | P2 <sub>1</sub> 2 <sub>1</sub> 2 <sub>1</sub>                                                                          |
| Unit cell dimensions            | a = 21.956(2) Å $\alpha = 90^\circ$ .<br>b = 22.554(2) Å $\beta = 90^\circ$ .<br>c = 25.737(3) Å $\gamma = 90^\circ$ . |
| Volume                          | 12745(2) Å <sup>3</sup>                                                                                                |
| Z                               | 8                                                                                                                      |
| Density (calculated)            | 1.269 Mg/m <sup>3</sup>                                                                                                |
| Absorption coefficient          | 1.620 mm <sup>-1</sup>                                                                                                 |
| F(000)                          | 5144                                                                                                                   |
| Crystal color                   | purple                                                                                                                 |
| Crystal size                    | 0.262 x 0.217 x 0.163 mm <sup>3</sup>                                                                                  |
| Theta range for data collection | 1.200 to 26.481°                                                                                                       |
| Index ranges                    | -27 ≤ h ≤ 27, -28 ≤ k ≤ 28, -32 ≤ l ≤ 32                                                                               |
| Reflections collected           | 139038                                                                                                                 |
| Independent reflections         | 26235 [R(int) = 0.1045]                                                                                                |
| Completeness to theta = 25.500° | 100.0 %                                                                                                                |
| Absorption correction           | Semi-empirical from equivalents                                                                                        |
| Max. and min. transmission      | 0.4296 and 0.3637                                                                                                      |
| Refinement method               | Full-matrix least-squares on F <sup>2</sup>                                                                            |
| Data / restraints / parameters  | 26235 / 0 / 1042                                                                                                       |

|                                                  |                                    |
|--------------------------------------------------|------------------------------------|
| Goodness-of-fit on $F^2$                         | 1.009                              |
| Final R indices [ $I > 2\sigma(I)$ = 18684 data] | R1 = 0.0522, wR2 = 0.0910          |
| R indices (all data, 0.73 Å)                     | R1 = 0.0941, wR2 = 0.1048          |
| Absolute structure parameter                     | -0.006(3)                          |
| Extinction coefficient                           | n/a                                |
| Largest diff. peak and hole                      | 0.981 and -1.073 e.Å <sup>-3</sup> |

**Table S10. Bond lengths [Å] for ajr29 (2-Tm).**

---

|             |           |
|-------------|-----------|
| Tm(1)-N(2)  | 2.335(7)  |
| Tm(1)-N(1)  | 2.353(7)  |
| Tm(1)-N(3)  | 2.357(6)  |
| Tm(1)-Si(3) | 3.330(3)  |
| Tm(1)-Si(2) | 3.353(2)  |
| Si(1)-N(1)  | 1.680(7)  |
| Si(1)-C(1)  | 1.865(10) |
| Si(1)-C(3)  | 1.877(10) |
| Si(1)-C(2)  | 1.881(10) |
| Si(2)-N(1)  | 1.679(7)  |
| Si(2)-C(4)  | 1.864(10) |
| Si(2)-C(5)  | 1.876(10) |
| Si(2)-C(6)  | 1.881(10) |
| Si(3)-N(2)  | 1.675(8)  |
| Si(3)-C(9)  | 1.865(10) |
| Si(3)-C(7)  | 1.883(10) |

|             |           |
|-------------|-----------|
| Si(3)-C(8)  | 1.897(10) |
| Si(4)-N(2)  | 1.701(8)  |
| Si(4)-C(12) | 1.870(11) |
| Si(4)-C(11) | 1.877(10) |
| Si(4)-C(10) | 1.890(10) |
| Si(5)-N(3)  | 1.684(7)  |
| Si(5)-C(15) | 1.875(9)  |
| Si(5)-C(13) | 1.881(9)  |
| Si(5)-C(14) | 1.886(9)  |
| Si(6)-N(3)  | 1.683(7)  |
| Si(6)-C(16) | 1.867(9)  |
| Si(6)-C(17) | 1.872(9)  |
| Si(6)-C(18) | 1.886(9)  |
| Tm(2)-N(5)  | 2.338(7)  |
| Tm(2)-N(4)  | 2.346(6)  |
| Tm(2)-N(6)  | 2.348(7)  |

**Table S11. Crystal data and structure refinement for ajr40 (2-Gd).**

|                     |                          |
|---------------------|--------------------------|
| Identification code | ajr40                    |
| Empirical formula   | C42 H102 Gd K N3 O12 Si6 |
| Formula weight      | 1206.15                  |
| Temperature         | 133(2) K                 |
| Wavelength          | 0.71073 Å                |
| Crystal system      | Monoclinic               |
| Space group         | P2 <sub>1</sub> /n       |

|                                          |                                             |                    |
|------------------------------------------|---------------------------------------------|--------------------|
| Unit cell dimensions                     | a = 11.1493(11) Å                           | β = 90°.           |
|                                          | b = 27.059(3) Å                             | γ = 104.0069(13)°. |
|                                          | c = 21.755(2) Å                             | α = 90°.           |
| Volume                                   | 6368.1(11) Å <sup>3</sup>                   |                    |
| Z                                        | 4                                           |                    |
| Density (calculated)                     | 1.258 Mg/m <sup>3</sup>                     |                    |
| Absorption coefficient                   | 1.269 mm <sup>-1</sup>                      |                    |
| F(000)                                   | 2552                                        |                    |
| Crystal color                            | purple                                      |                    |
| Crystal size                             | 0.253 x 0.239 x 0.192 mm <sup>3</sup>       |                    |
| Theta range for data collection          | 1.223 to 29.134°                            |                    |
| Index ranges                             | -15 ≤ h ≤ 15, -35 ≤ k ≤ 35, -28 ≤ l ≤ 28    |                    |
| Reflections collected                    | 78726                                       |                    |
| Independent reflections                  | 16163 [R(int) = 0.0511]                     |                    |
| Completeness to theta = 25.500°          | 100.0 %                                     |                    |
| Absorption correction                    | Semi-empirical from equivalents             |                    |
| Max. and min. transmission               | 0.4319 and 0.3744                           |                    |
| Refinement method                        | Full-matrix least-squares on F <sup>2</sup> |                    |
| Data / restraints / parameters           | 16163 / 0 / 544                             |                    |
| Goodness-of-fit on F <sup>2</sup>        | 1.100                                       |                    |
| Final R indices [I > 2σ(I) = 13374 data] | R1 = 0.0466, wR2 = 0.0904                   |                    |
| R indices (all data, 0.73 Å)             | R1 = 0.0623, wR2 = 0.0953                   |                    |
| Extinction coefficient                   | n/a                                         |                    |
| Largest diff. peak and hole              | 1.009 and -1.022 e.Å <sup>-3</sup>          |                    |

**Table S12. Bond lengths [Å] for ajr40(2-Gd).**

---

|             |            |
|-------------|------------|
| Gd(1)-N(2)  | 2.308(3)   |
| Gd(1)-N(1)  | 2.310(3)   |
| Gd(1)-N(3)  | 2.310(3)   |
| Gd(1)-Si(6) | 3.4562(9)  |
| Gd(1)-Si(3) | 3.4595(10) |
| Si(1)-N(1)  | 1.708(3)   |
| Si(1)-C(3)  | 1.878(4)   |
| Si(1)-C(1)  | 1.878(4)   |
| Si(1)-C(2)  | 1.881(4)   |
| Si(2)-N(1)  | 1.708(3)   |
| Si(2)-C(6)  | 1.878(4)   |
| Si(2)-C(5)  | 1.881(4)   |
| Si(2)-C(4)  | 1.882(4)   |
| Si(3)-N(3)  | 1.709(3)   |
| Si(3)-C(8)  | 1.877(4)   |
| Si(3)-C(7)  | 1.878(4)   |
| Si(3)-C(9)  | 1.886(4)   |
| Si(4)-N(3)  | 1.706(3)   |
| Si(4)-C(12) | 1.878(4)   |
| Si(4)-C(10) | 1.883(3)   |
| Si(4)-C(11) | 1.889(4)   |
| Si(5)-N(2)  | 1.709(3)   |
| Si(5)-C(13) | 1.876(4)   |

|             |          |
|-------------|----------|
| Si(5)-C(15) | 1.884(4) |
| Si(5)-C(14) | 1.884(4) |
| Si(6)-N(2)  | 1.701(3) |
| Si(6)-C(17) | 1.882(4) |
| Si(6)-C(18) | 1.883(3) |
| Si(6)-C(16) | 1.883(3) |

**Table S13. Crystal data and structure refinement for ajr43 (2-Ho).**

|                        |                                                                                      |                    |
|------------------------|--------------------------------------------------------------------------------------|--------------------|
| Identification code    | ajr43                                                                                |                    |
| Empirical formula      | C <sub>42</sub> H <sub>102</sub> Ho K N <sub>3</sub> O <sub>12</sub> Si <sub>6</sub> |                    |
| Formula weight         | 1213.83                                                                              |                    |
| Temperature            | 133(2) K                                                                             |                    |
| Wavelength             | 0.71073 Å                                                                            |                    |
| Crystal system         | Monoclinic                                                                           |                    |
| Space group            | P2 <sub>1</sub> /n                                                                   |                    |
| Unit cell dimensions   | a = 11.0476(11) Å                                                                    | ∠ = 90°.           |
|                        | b = 27.157(3) Å                                                                      | ∠ = 103.9052(12)°. |
|                        | c = 21.797(2) Å                                                                      | ∠ = 90°.           |
| Volume                 | 6347.9(11) Å <sup>3</sup>                                                            |                    |
| Z                      | 4                                                                                    |                    |
| Density (calculated)   | 1.270 Mg/m <sup>3</sup>                                                              |                    |
| Absorption coefficient | 1.475 mm <sup>-1</sup>                                                               |                    |
| F(000)                 | 2564                                                                                 |                    |
| Crystal color          | Blue                                                                                 |                    |
| Crystal size           | 0.378 x 0.375 x 0.367 mm <sup>3</sup>                                                |                    |



|                                          |                                             |
|------------------------------------------|---------------------------------------------|
| Theta range for data collection          | 1.220 to 28.873°                            |
| Index ranges                             | -14 ≤ h ≤ 14, -36 ≤ k ≤ 36, -29 ≤ l ≤ 29    |
| Reflections collected                    | 75935                                       |
| Independent reflections                  | 15608 [R(int) = 0.0434]                     |
| Completeness to theta = 25.500°          | 99.9 %                                      |
| Absorption correction                    | Semi-empirical from equivalents             |
| Max. and min. transmission               | 0.7458 and 0.6626                           |
| Refinement method                        | Full-matrix least-squares on F <sup>2</sup> |
| Data / restraints / parameters           | 15608 / 0 / 553                             |
| Goodness-of-fit on F <sup>2</sup>        | 1.028                                       |
| Final R indices [I > 2σ(I) = 14019 data] | R1 = 0.0368, wR2 = 0.0883                   |
| R indices (all data, 0.74 Å)             | R1 = 0.0417, wR2 = 0.0914                   |
| Extinction coefficient                   | n/a                                         |
| Largest diff. peak and hole              | 2.859 and -0.882 e.Å <sup>-3</sup>          |

**Table S14. Bond lengths [Å] for ajr43 (2-Ho).**

---

|             |           |
|-------------|-----------|
| Ho(1)-N(3)  | 2.262(2)  |
| Ho(1)-N(2)  | 2.264(2)  |
| Ho(1)-N(1)  | 2.274(2)  |
| Ho(1)-Si(5) | 3.3709(8) |
| Ho(1)-Si(3) | 3.3832(9) |
| Ho(1)-Si(1) | 3.3860(9) |
| Ho(2)-N(1)  | 2.258(5)  |
| Ho(2)-N(3)  | 2.311(5)  |
| Ho(2)-N(2)  | 2.318(4)  |

|             |          |
|-------------|----------|
| Ho(2)-C(5)  | 2.947(6) |
| Ho(2)-Si(2) | 3.120(4) |
| Ho(2)-Si(4) | 3.201(4) |
| Ho(2)-Si(6) | 3.212(4) |
| Si(1)-N(1)  | 1.713(2) |
| Si(1)-C(1)  | 1.867(4) |
| Si(1)-C(2)  | 1.873(4) |
| Si(1)-C(3)  | 1.882(4) |
| Si(2)-N(1)  | 1.707(2) |
| Si(2)-C(5)  | 1.872(3) |
| Si(2)-C(6)  | 1.878(4) |
| Si(2)-C(4)  | 1.882(3) |
| Si(3)-N(3)  | 1.721(3) |
| Si(3)-C(8)  | 1.870(4) |
| Si(3)-C(7)  | 1.881(4) |
| Si(3)-C(9)  | 1.881(4) |
| Si(4)-N(3)  | 1.708(3) |
| Si(4)-C(11) | 1.872(3) |
| Si(4)-C(10) | 1.879(3) |
| Si(4)-C(12) | 1.884(4) |
| Si(5)-N(2)  | 1.714(2) |
| Si(5)-C(14) | 1.866(3) |
| Si(5)-C(13) | 1.876(3) |
| Si(5)-C(15) | 1.878(4) |
| Si(6)-N(2)  | 1.702(2) |

|             |          |
|-------------|----------|
| Si(6)-C(17) | 1.874(3) |
| Si(6)-C(18) | 1.875(3) |
| Si(6)-C(16) | 1.888(3) |

**Table S15. Crystal data and structure refinement for ajr15 (3-Dy).**

|                                          |                                             |                   |
|------------------------------------------|---------------------------------------------|-------------------|
| Identification code                      | ajr15                                       |                   |
| Empirical formula                        | C78 H190 Dy2 K2 N6 O21 Si12                 |                   |
| Formula weight                           | 2288.63                                     |                   |
| Temperature                              | 88(2) K                                     |                   |
| Wavelength                               | 0.71073 Å                                   |                   |
| Crystal system                           | Monoclinic                                  |                   |
| Space group                              | C2/c                                        |                   |
| Unit cell dimensions                     | a = 25.4899(16) Å                           | ∠ = 90°.          |
|                                          | b = 18.8304(12) Å                           | ∠ = 103.1276(9)°. |
|                                          | c = 25.7453(16) Å                           | ∠ = 90°.          |
| Volume                                   | 12034.4(13) Å <sup>3</sup>                  |                   |
| Z                                        | 4                                           |                   |
| Density (calculated)                     | 1.263 Mg/m <sup>3</sup>                     |                   |
| Absorption coefficient                   | 1.477 mm <sup>-1</sup>                      |                   |
| F(000)                                   | 4824                                        |                   |
| Crystal color                            | colorless                                   |                   |
| Crystal size                             | 0.264 x 0.141 x 0.048 mm <sup>3</sup>       |                   |
| Theta range for data collection          | 1.357 to 29.158°                            |                   |
| Index ranges                             | -33 ≤ h ≤ 34, -25 ≤ k ≤ 25, -33 ≤ l ≤ 33    |                   |
| Reflections collected                    | 74183                                       |                   |
| Independent reflections                  | 15305 [R(int) = 0.0735]                     |                   |
| Completeness to theta = 25.500°          | 100.0 %                                     |                   |
| Absorption correction                    | Semi-empirical from equivalents             |                   |
| Max. and min. transmission               | 0.4319 and 0.3949                           |                   |
| Refinement method                        | Full-matrix least-squares on F <sup>2</sup> |                   |
| Data / restraints / parameters           | 15305 / 0 / 567                             |                   |
| Goodness-of-fit on F <sup>2</sup>        | 1.114                                       |                   |
| Final R indices [I > 2σ(I) = 10683 data] | R1 = 0.0373, wR2 = 0.0667                   |                   |
| R indices (all data, 0.73 Å)             | R1 = 0.0738, wR2 = 0.0846                   |                   |

Extinction coefficient n/a  
Largest diff. peak and hole 0.614 and -0.651 e.Å<sup>-3</sup>

**Table S16. Bond lengths [Å] for ajr15 (3-Dy).**

---

|             |            |
|-------------|------------|
| Dy(1)-O(1)  | 2.070(2)   |
| Dy(1)-N(1)  | 2.282(3)   |
| Dy(1)-N(2)  | 2.290(2)   |
| Dy(1)-N(3)  | 2.296(3)   |
| Dy(1)-Si(3) | 3.3846(10) |
| Dy(1)-Si(6) | 3.3882(9)  |
| Dy(1)-Si(1) | 3.4043(9)  |
| K(1)-O(10)  | 2.776(2)   |
| K(1)-O(7)   | 2.815(2)   |
| K(1)-O(6)   | 2.834(2)   |
| K(1)-O(3)   | 2.840(2)   |
| K(1)-O(5)   | 2.845(2)   |
| K(1)-O(2)   | 2.883(2)   |
| K(1)-O(9)   | 2.894(2)   |
| K(1)-O(4)   | 2.896(2)   |
| K(1)-C(35)  | 3.388(3)   |
| Si(1)-N(1)  | 1.714(3)   |
| Si(1)-C(3)  | 1.871(4)   |
| Si(1)-C(4)  | 1.881(3)   |
| Si(1)-C(2)  | 1.884(4)   |
| Si(2)-N(1)  | 1.707(3)   |
| Si(2)-C(7)  | 1.878(4)   |
| Si(2)-C(5)  | 1.885(4)   |
| Si(2)-C(6)  | 1.886(4)   |
| Si(3)-N(3)  | 1.719(3)   |
| Si(3)-C(8)  | 1.873(3)   |
| Si(3)-C(9)  | 1.883(4)   |
| Si(3)-C(10) | 1.885(3)   |
| Si(4)-N(3)  | 1.707(3)   |
| Si(4)-C(13) | 1.871(4)   |

|             |          |
|-------------|----------|
| Si(4)-C(11) | 1.882(3) |
| Si(4)-C(12) | 1.884(3) |
| Si(5)-N(2)  | 1.704(3) |
| Si(5)-C(14) | 1.877(3) |
| Si(5)-C(15) | 1.884(4) |
| Si(5)-C(16) | 1.886(4) |
| Si(6)-N(2)  | 1.720(3) |
| Si(6)-C(18) | 1.871(4) |
| Si(6)-C(19) | 1.878(3) |
| Si(6)-C(17) | 1.884(4) |
| O(1)-C(1)   | 1.311(4) |
| O(2)-C(21)  | 1.418(4) |
| O(2)-C(22)  | 1.425(4) |
| O(3)-C(24)  | 1.422(4) |
| O(3)-C(23)  | 1.423(4) |
| O(4)-C(25)  | 1.417(4) |
| O(4)-C(26)  | 1.430(4) |
| O(5)-C(28)  | 1.411(4) |
| O(5)-C(27)  | 1.422(4) |
| O(6)-C(30)  | 1.423(4) |
| O(6)-C(29)  | 1.423(4) |
| O(7)-C(20)  | 1.419(4) |
| O(7)-C(31)  | 1.425(4) |
| O(8)-C(32)  | 1.420(3) |
| O(8)-C(33)  | 1.423(3) |
| O(9)-C(34)  | 1.428(3) |
| O(9)-C(35)  | 1.439(3) |
| O(10)-C(36) | 1.425(3) |
| O(10)-C(37) | 1.429(4) |
| C(1)-C(1)#1 | 1.183(6) |
| C(20)-C(21) | 1.506(4) |
| C(22)-C(23) | 1.499(5) |
| C(24)-C(25) | 1.499(5) |
| C(26)-C(27) | 1.491(5) |
| C(28)-C(29) | 1.495(5) |
| C(30)-C(31) | 1.494(5) |

|               |           |
|---------------|-----------|
| C(32)-C(37)#2 | 1.510(4)  |
| C(33)-C(34)   | 1.502(4)  |
| C(35)-C(36)   | 1.511(4)  |
| C(37)-C(32)#2 | 1.510(4)  |
| O(11)-C(44)#3 | 1.357(10) |
| O(11)-C(44)   | 1.357(10) |
| O(11)-C(45)#3 | 1.496(9)  |
| O(11)-C(45)   | 1.496(9)  |
| C(44)-C(46)   | 1.509(11) |
| C(45)-C(46)   | 1.422(10) |

**Table S17. Crystal data and structure refinement for ajr26 (3-Ho).**

|                        |                                                                                                                 |                    |
|------------------------|-----------------------------------------------------------------------------------------------------------------|--------------------|
| Identification code    | ajr26                                                                                                           |                    |
| Empirical formula      | C <sub>78</sub> H <sub>190</sub> Ho <sub>2</sub> K <sub>2</sub> N <sub>6</sub> O <sub>21</sub> Si <sub>12</sub> |                    |
| Formula weight         | 2293.49                                                                                                         |                    |
| Temperature            | 133(2) K                                                                                                        |                    |
| Wavelength             | 0.71073 Å                                                                                                       |                    |
| Crystal system         | Monoclinic                                                                                                      |                    |
| Space group            | C2/c                                                                                                            |                    |
| Unit cell dimensions   | a = 25.514(3) Å                                                                                                 | ∠ = 90°.           |
|                        | b = 18.800(2) Å                                                                                                 | ∠ = 103.1674(15)°. |
|                        | c = 25.712(3) Å                                                                                                 | ∠ = 90°.           |
| Volume                 | 12009(2) Å <sup>3</sup>                                                                                         |                    |
| Z                      | 4                                                                                                               |                    |
| Density (calculated)   | 1.269 Mg/m <sup>3</sup>                                                                                         |                    |
| Absorption coefficient | 1.553 mm <sup>-1</sup>                                                                                          |                    |
| F(000)                 | 4832                                                                                                            |                    |
| Crystal color          | yellow                                                                                                          |                    |

|                                          |                                             |
|------------------------------------------|---------------------------------------------|
| Crystal size                             | 0.347 x 0.202 x 0.132 mm <sup>3</sup>       |
| Theta range for data collection          | 1.358 to 28.864°                            |
| Index ranges                             | -33 ≤ h ≤ 33, -25 ≤ k ≤ 25, -34 ≤ l ≤ 32    |
| Reflections collected                    | 61845                                       |
| Independent reflections                  | 14710 [R(int) = 0.0318]                     |
| Completeness to theta = 25.500°          | 100.0 %                                     |
| Absorption correction                    | Semi-empirical from equivalents             |
| Max. and min. transmission               | 0.4316 and 0.3733                           |
| Refinement method                        | Full-matrix least-squares on F <sup>2</sup> |
| Data / restraints / parameters           | 14710 / 0 / 559                             |
| Goodness-of-fit on F <sup>2</sup>        | 1.025                                       |
| Final R indices [I > 2σ(I) = 12462 data] | R1 = 0.0251, wR2 = 0.0554                   |
| R indices (all data, 0.73 Å)             | R1 = 0.0345, wR2 = 0.0589                   |
| Extinction coefficient                   | n/a                                         |
| Largest diff. peak and hole              | 0.631 and -0.377 e.Å <sup>-3</sup>          |

**Table S18. Bond lengths [Å] for ajr26 (3-Ho).**

---

|             |            |
|-------------|------------|
| Ho(1)-O(1)  | 2.0598(14) |
| Ho(1)-N(1)  | 2.2716(15) |
| Ho(1)-N(2)  | 2.2780(16) |
| Ho(1)-N(3)  | 2.2802(16) |
| Ho(1)-Si(6) | 3.3691(6)  |
| Ho(1)-Si(3) | 3.3723(7)  |
| Ho(1)-Si(1) | 3.3834(6)  |

|             |            |
|-------------|------------|
| Si(1)-N(1)  | 1.7140(18) |
| Si(1)-C(3)  | 1.873(2)   |
| Si(1)-C(4)  | 1.874(2)   |
| Si(1)-C(2)  | 1.887(2)   |
| Si(2)-N(1)  | 1.7015(18) |
| Si(2)-C(7)  | 1.868(3)   |
| Si(2)-C(6)  | 1.879(3)   |
| Si(2)-C(5)  | 1.882(2)   |
| Si(3)-N(3)  | 1.7161(18) |
| Si(3)-C(8)  | 1.872(2)   |
| Si(3)-C(10) | 1.878(2)   |
| Si(3)-C(9)  | 1.879(2)   |
| Si(4)-N(3)  | 1.7063(18) |
| Si(4)-C(13) | 1.871(2)   |
| Si(4)-C(11) | 1.883(2)   |
| Si(4)-C(12) | 1.883(2)   |
| Si(5)-N(2)  | 1.7059(17) |
| Si(5)-C(14) | 1.873(2)   |
| Si(5)-C(16) | 1.878(2)   |
| Si(5)-C(15) | 1.884(2)   |
| Si(6)-N(2)  | 1.7145(18) |
| Si(6)-C(18) | 1.870(3)   |
| Si(6)-C(19) | 1.875(2)   |
| Si(6)-C(17) | 1.884(3)   |
| O(1)-C(1)   | 1.301(2)   |



|             |            |
|-------------|------------|
| C(1)-C(1)#1 | 1.186(4)   |
| K(1)-O(10)  | 2.7717(14) |
| K(1)-O(7)   | 2.8118(15) |
| K(1)-O(6)   | 2.8347(15) |
| K(1)-O(3)   | 2.8387(15) |
| K(1)-O(5)   | 2.8464(15) |
| K(1)-O(2)   | 2.8779(15) |
| K(1)-O(9)   | 2.8972(15) |
| K(1)-O(4)   | 2.8974(15) |
| K(1)-C(35)  | 3.394(2)   |
| O(2)-C(21)  | 1.415(2)   |
| O(2)-C(22)  | 1.420(3)   |
| O(3)-C(24)  | 1.417(3)   |
| O(3)-C(23)  | 1.422(3)   |
| O(4)-C(25)  | 1.419(3)   |
| O(4)-C(26)  | 1.422(3)   |
| O(5)-C(28)  | 1.406(3)   |
| O(5)-C(27)  | 1.416(3)   |
| O(6)-C(29)  | 1.416(3)   |
| O(6)-C(30)  | 1.419(3)   |
| O(7)-C(20)  | 1.418(2)   |
| O(7)-C(31)  | 1.420(2)   |
| O(8)-C(32)  | 1.420(2)   |
| O(8)-C(33)  | 1.426(2)   |
| O(9)-C(34)  | 1.424(2)   |

|               |          |
|---------------|----------|
| O(9)-C(35)    | 1.432(2) |
| O(10)-C(36)   | 1.423(2) |
| O(10)-C(37)   | 1.428(2) |
| C(20)-C(21)   | 1.498(3) |
| C(22)-C(23)   | 1.498(3) |
| C(24)-C(25)   | 1.498(3) |
| C(26)-C(27)   | 1.495(4) |
| C(28)-C(29)   | 1.501(4) |
| C(30)-C(31)   | 1.501(3) |
| C(32)-C(37)#2 | 1.504(3) |
| C(33)-C(34)   | 1.504(3) |
| C(35)-C(36)   | 1.503(3) |
| C(37)-C(32)#2 | 1.504(3) |
| O-C(44)#3     | 1.355(6) |
| O-C(44)       | 1.355(6) |
| O-C(45)#3     | 1.496(6) |
| O-C(45)       | 1.496(6) |
| C(44)-C(46)   | 1.514(7) |
| C(45)-C(46)   | 1.421(7) |

**Table S19. Crystal data and structure refinement for ajr41 (3-Tm).**

|                     |                             |
|---------------------|-----------------------------|
| Identification code | ajr41                       |
| Empirical formula   | C78 H190 K2 N6 O21 Si12 Tm2 |
| Formula weight      | 2301.49                     |
| Temperature         | 88(2) K                     |

|                                          |                                                                                                                                  |
|------------------------------------------|----------------------------------------------------------------------------------------------------------------------------------|
| Wavelength                               | 0.71073 Å                                                                                                                        |
| Crystal system                           | Monoclinic                                                                                                                       |
| Space group                              | C2/c                                                                                                                             |
| Unit cell dimensions                     | a = 25.453(3) Å $\alpha = 90^\circ$ .<br>b = 18.757(2) Å $\beta = 103.1418(15)^\circ$ .<br>c = 25.744(3) Å $\gamma = 90^\circ$ . |
| Volume                                   | 11969(2) Å <sup>3</sup>                                                                                                          |
| Z                                        | 4                                                                                                                                |
| Density (calculated)                     | 1.277 Mg/m <sup>3</sup>                                                                                                          |
| Absorption coefficient                   | 1.719 mm <sup>-1</sup>                                                                                                           |
| F(000)                                   | 4848                                                                                                                             |
| Crystal color                            | colourless                                                                                                                       |
| Crystal size                             | 0.214 x 0.200 x 0.196 mm <sup>3</sup>                                                                                            |
| Theta range for data collection          | 1.361 to 29.125°                                                                                                                 |
| Index ranges                             | -34 ≤ h ≤ 34, -24 ≤ k ≤ 24, -33 ≤ l ≤ 34                                                                                         |
| Reflections collected                    | 73762                                                                                                                            |
| Independent reflections                  | 15214 [R(int) = 0.0304]                                                                                                          |
| Completeness to theta = 25.500°          | 100.0 %                                                                                                                          |
| Absorption correction                    | Semi-empirical from equivalents                                                                                                  |
| Max. and min. transmission               | 0.7458 and 0.6513                                                                                                                |
| Refinement method                        | Full-matrix least-squares on F <sup>2</sup>                                                                                      |
| Data / restraints / parameters           | 15214 / 0 / 559                                                                                                                  |
| Goodness-of-fit on F <sup>2</sup>        | 1.011                                                                                                                            |
| Final R indices [I > 2σ(I) = 12794 data] | R1 = 0.0244, wR2 = 0.0509                                                                                                        |
| R indices (all data, 0.73 Å)             | R1 = 0.0349, wR2 = 0.0554                                                                                                        |

|                             |                                    |
|-----------------------------|------------------------------------|
| Extinction coefficient      | n/a                                |
| Largest diff. peak and hole | 0.652 and -1.122 e.Å <sup>-3</sup> |

**Table S20. Bond lengths [Å] ajr41 (3-Tm).**

---

|             |            |
|-------------|------------|
| Tm(1)-O(1)  | 2.0428(14) |
| Tm(1)-N(1)  | 2.2465(17) |
| Tm(1)-N(2)  | 2.2533(16) |
| Tm(1)-N(3)  | 2.2548(16) |
| Tm(1)-Si(3) | 3.3487(7)  |
| Tm(1)-Si(6) | 3.3502(6)  |
| Tm(1)-Si(1) | 3.3632(7)  |
| K(1)-O(10)  | 2.7714(13) |
| K(1)-O(7)   | 2.8168(14) |
| K(1)-O(6)   | 2.8296(15) |
| K(1)-O(3)   | 2.8375(15) |
| K(1)-O(5)   | 2.8441(15) |
| K(1)-O(2)   | 2.8833(14) |
| K(1)-O(9)   | 2.8911(14) |
| K(1)-O(4)   | 2.8979(15) |
| K(1)-C(35)  | 3.388(2)   |
| Si(1)-N(1)  | 1.717(2)   |
| Si(1)-C(3)  | 1.876(3)   |
| Si(1)-C(4)  | 1.879(2)   |
| Si(1)-C(2)  | 1.891(2)   |

|             |            |
|-------------|------------|
| Si(2)-N(1)  | 1.705(2)   |
| Si(2)-C(7)  | 1.871(3)   |
| Si(2)-C(5)  | 1.879(2)   |
| Si(2)-C(6)  | 1.885(2)   |
| Si(3)-N(3)  | 1.721(2)   |
| Si(3)-C(8)  | 1.875(2)   |
| Si(3)-C(9)  | 1.881(2)   |
| Si(3)-C(10) | 1.883(2)   |
| Si(4)-N(3)  | 1.7092(18) |
| Si(4)-C(13) | 1.873(2)   |
| Si(4)-C(11) | 1.885(2)   |
| Si(4)-C(12) | 1.886(2)   |
| Si(5)-N(2)  | 1.7069(17) |
| Si(5)-C(14) | 1.877(2)   |
| Si(5)-C(16) | 1.882(2)   |
| Si(5)-C(15) | 1.887(2)   |
| Si(6)-N(2)  | 1.7203(17) |
| Si(6)-C(18) | 1.874(3)   |
| Si(6)-C(19) | 1.879(2)   |
| Si(6)-C(17) | 1.882(2)   |
| O(1)-C(1)   | 1.303(2)   |
| O(2)-C(21)  | 1.421(2)   |
| O(2)-C(22)  | 1.422(2)   |
| O(3)-C(23)  | 1.425(3)   |
| O(3)-C(24)  | 1.428(3)   |

|               |          |
|---------------|----------|
| O(4)-C(25)    | 1.417(3) |
| O(4)-C(26)    | 1.427(3) |
| O(5)-C(28)    | 1.414(3) |
| O(5)-C(27)    | 1.426(3) |
| O(6)-C(30)    | 1.424(3) |
| O(6)-C(29)    | 1.428(3) |
| O(7)-C(20)    | 1.422(2) |
| O(7)-C(31)    | 1.425(2) |
| O(8)-C(32)    | 1.423(2) |
| O(8)-C(33)    | 1.424(2) |
| O(9)-C(34)    | 1.425(2) |
| O(9)-C(35)    | 1.435(2) |
| O(10)-C(36)   | 1.426(2) |
| O(10)-C(37)   | 1.428(2) |
| C(1)-C(1)#1   | 1.184(4) |
| C(20)-C(21)   | 1.498(3) |
| C(22)-C(23)   | 1.499(3) |
| C(24)-C(25)   | 1.494(3) |
| C(26)-C(27)   | 1.494(4) |
| C(28)-C(29)   | 1.489(4) |
| C(30)-C(31)   | 1.502(3) |
| C(32)-C(37)#2 | 1.511(3) |
| C(33)-C(34)   | 1.504(3) |
| C(35)-C(36)   | 1.505(3) |
| C(37)-C(32)#2 | 1.511(3) |

|               |          |
|---------------|----------|
| O(11)-C(44)#3 | 1.359(6) |
| O(11)-C(44)   | 1.359(6) |
| O(11)-C(45)   | 1.523(6) |
| O(11)-C(45)#3 | 1.523(6) |
| C(44)-C(46)   | 1.520(7) |
| C(45)-C(46)   | 1.396(7) |

**Table S21. Crystal data and structure refinement for ajr32 (4-Gd).**

|                                 |                                                                                                                |                    |
|---------------------------------|----------------------------------------------------------------------------------------------------------------|--------------------|
| Identification code             | ajr32                                                                                                          |                    |
| Empirical formula               | C <sub>52</sub> H <sub>124</sub> Gd <sub>2</sub> K <sub>2</sub> N <sub>4</sub> O <sub>16</sub> Si <sub>8</sub> |                    |
| Formula weight                  | 1678.96                                                                                                        |                    |
| Temperature                     | 133(2) K                                                                                                       |                    |
| Wavelength                      | 0.71073 Å                                                                                                      |                    |
| Crystal system                  | Triclinic                                                                                                      |                    |
| Space group                     | P-1                                                                                                            |                    |
| Unit cell dimensions            | a = 12.6614(13) Å                                                                                              | β = 94.4758(13)°.  |
|                                 | b = 15.5498(15) Å                                                                                              | γ = 94.0831(13)°.  |
|                                 | c = 21.205(2) Å                                                                                                | α = 105.7458(12)°. |
| Volume                          | 3987.4(7) Å <sup>3</sup>                                                                                       |                    |
| Z                               | 2                                                                                                              |                    |
| Density (calculated)            | 1.398 Mg/m <sup>3</sup>                                                                                        |                    |
| Absorption coefficient          | 1.929 mm <sup>-1</sup>                                                                                         |                    |
| F(000)                          | 1740                                                                                                           |                    |
| Crystal color                   | colorless                                                                                                      |                    |
| Crystal size                    | 0.241 x 0.127 x 0.119 mm <sup>3</sup>                                                                          |                    |
| Theta range for data collection | 0.968 to 28.896°                                                                                               |                    |
| Index ranges                    | -16 ≤ h ≤ 17, -20 ≤ k ≤ 21, -27 ≤ l ≤ 28                                                                       |                    |
| Reflections collected           | 48467                                                                                                          |                    |
| Independent reflections         | 19003 [R(int) = 0.0368]                                                                                        |                    |
| Completeness to theta = 25.500° | 99.8 %                                                                                                         |                    |
| Absorption correction           | Semi-empirical from equivalents                                                                                |                    |
| Max. and min. transmission      | 0.4316 and 0.3793                                                                                              |                    |
| Refinement method               | Full-matrix least-squares on F <sup>2</sup>                                                                    |                    |
| Data / restraints / parameters  | 19003 / 0 / 769                                                                                                |                    |

|                                                  |                                    |
|--------------------------------------------------|------------------------------------|
| Goodness-of-fit on $F^2$                         | 0.989                              |
| Final R indices [ $I > 2\sigma(I)$ = 14746 data] | R1 = 0.0332, wR2 = 0.0614          |
| R indices (all data, 0.73 Å)                     | R1 = 0.0538, wR2 = 0.0672          |
| Extinction coefficient                           | n/a                                |
| Largest diff. peak and hole                      | 1.126 and -0.482 e.Å <sup>-3</sup> |

**Table S22. Bond lengths [Å] for ajr32 (4-Gd).**

---

|               |            |
|---------------|------------|
| Gd(1)-O(1)    | 2.2667(19) |
| Gd(1)-O(2)#1  | 2.2791(19) |
| Gd(1)-N(2)    | 2.322(2)   |
| Gd(1)-N(1)    | 2.354(2)   |
| Gd(1)-O(2)    | 2.3694(19) |
| Gd(1)-C(1)    | 2.929(3)   |
| Gd(1)-C(2)    | 2.999(3)   |
| Gd(1)-Si(4)   | 3.4382(9)  |
| Gd(1)-Gd(1)#1 | 3.8719(4)  |
| K(1)-O(1)     | 2.745(2)   |
| K(1)-O(8)     | 2.803(2)   |
| K(1)-O(5)     | 2.865(2)   |
| K(1)-O(11)    | 2.895(8)   |
| K(1)-O(10)    | 2.904(3)   |
| K(1)-O(6)     | 2.910(2)   |
| K(1)-O(7)     | 2.957(2)   |
| K(1)-O(9)     | 3.011(8)   |
| K(1)-O(12)    | 3.028(4)   |
| K(1)-C(1)     | 3.271(3)   |
| K(1)-C(10)    | 3.467(3)   |
| K(1)-C(34)    | 3.479(7)   |
| Si(1)-N(1)    | 1.709(3)   |
| Si(1)-C(5)    | 1.871(3)   |
| Si(1)-C(7)    | 1.874(3)   |
| Si(1)-C(6)    | 1.882(3)   |
| Si(2)-N(1)    | 1.705(3)   |
| Si(2)-C(10)   | 1.872(3)   |



|              |            |
|--------------|------------|
| Si(2)-C(8)   | 1.881(3)   |
| Si(2)-C(9)   | 1.882(3)   |
| Si(3)-N(2)   | 1.706(3)   |
| Si(3)-C(11)  | 1.876(3)   |
| Si(3)-C(12)  | 1.877(3)   |
| Si(3)-C(13)  | 1.877(3)   |
| Si(4)-N(2)   | 1.705(3)   |
| Si(4)-C(16)  | 1.879(3)   |
| Si(4)-C(14)  | 1.882(3)   |
| Si(4)-C(15)  | 1.884(3)   |
| O(1)-C(1)    | 1.354(3)   |
| O(2)-C(2)    | 1.367(3)   |
| O(2)-Gd(1)#1 | 2.2791(19) |
| O(5)-C(29)   | 1.419(4)   |
| O(5)-C(47)   | 1.440(6)   |
| O(5)-C(48)   | 1.473(13)  |
| O(6)-C(30)   | 1.419(3)   |
| O(6)-C(31)   | 1.425(4)   |
| O(7)-C(33)   | 1.373(12)  |
| O(7)-C(32)   | 1.417(4)   |
| O(7)-C(34)   | 1.459(6)   |
| O(8)-C(36)   | 1.294(6)   |
| O(8)-C(37)   | 1.314(10)  |
| O(8)-C(38)   | 1.495(5)   |
| O(8)-C(35)   | 1.738(11)  |
| O(9)-C(39)   | 1.376(13)  |
| O(9)-C(41)   | 1.430(14)  |
| O(10)-C(40)  | 1.425(6)   |
| O(10)-C(42)  | 1.427(6)   |
| O(11)-C(45)  | 1.418(14)  |
| O(11)-C(43)  | 1.421(13)  |
| O(12)-C(46)  | 1.419(6)   |
| O(12)-C(44)  | 1.424(6)   |
| C(1)-C(2)    | 1.334(4)   |
| C(29)-C(30)  | 1.486(5)   |
| C(31)-C(32)  | 1.485(4)   |

|               |            |
|---------------|------------|
| C(33)-C(35)   | 1.486(16)  |
| C(34)-C(36)   | 1.489(8)   |
| C(37)-C(39)   | 1.468(15)  |
| C(38)-C(40)   | 1.495(7)   |
| C(41)-C(43)   | 1.450(16)  |
| C(42)-C(44)   | 1.489(7)   |
| C(45)-C(48)   | 1.479(17)  |
| C(46)-C(47)   | 1.488(8)   |
| Gd(2)-O(3)    | 2.2598(19) |
| Gd(2)-O(4)#2  | 2.2795(19) |
| Gd(2)-N(4)    | 2.329(2)   |
| Gd(2)-N(3)    | 2.356(2)   |
| Gd(2)-O(4)    | 2.3738(19) |
| Gd(2)-C(3)    | 2.985(3)   |
| Gd(2)-C(4)    | 3.050(3)   |
| Gd(2)-Si(6)   | 3.4316(9)  |
| Gd(2)-Gd(2)#2 | 3.8758(4)  |
| K(2)-O(3)     | 2.778(2)   |
| K(2)-O(18)    | 2.794(3)   |
| K(2)-O(16)    | 2.870(2)   |
| K(2)-O(13)    | 2.885(2)   |
| K(2)-O(19)    | 2.888(2)   |
| K(2)-O(14)    | 2.958(2)   |
| K(2)-O(15)    | 2.962(2)   |
| K(2)-O(17)    | 3.083(7)   |
| K(2)-C(3)     | 3.282(3)   |
| K(2)-C(61)    | 3.507(11)  |
| Si(5)-N(3)    | 1.711(2)   |
| Si(5)-C(19)   | 1.864(3)   |
| Si(5)-C(17)   | 1.879(3)   |
| Si(5)-C(18)   | 1.881(3)   |
| Si(6)-N(3)    | 1.710(2)   |
| Si(6)-C(22)   | 1.876(3)   |
| Si(6)-C(20)   | 1.878(3)   |
| Si(6)-C(21)   | 1.883(3)   |
| Si(7)-N(4)    | 1.700(2)   |

|              |            |
|--------------|------------|
| Si(7)-C(24)  | 1.871(3)   |
| Si(7)-C(23)  | 1.879(3)   |
| Si(7)-C(25)  | 1.882(3)   |
| Si(8)-N(4)   | 1.717(2)   |
| Si(8)-C(28)  | 1.866(3)   |
| Si(8)-C(27)  | 1.879(3)   |
| Si(8)-C(26)  | 1.893(3)   |
| O(3)-C(3)    | 1.351(3)   |
| O(4)-C(4)    | 1.378(3)   |
| O(4)-Gd(2)#2 | 2.2794(19) |
| O(13)-C(57)  | 1.421(3)   |
| O(13)-C(56)  | 1.427(4)   |
| O(14)-C(55)  | 1.416(4)   |
| O(14)-C(54)  | 1.425(3)   |
| O(15)-C(52)  | 1.425(3)   |
| O(15)-C(53)  | 1.427(3)   |
| O(16)-C(51)  | 1.422(3)   |
| O(16)-C(50)  | 1.426(3)   |
| O(17)-C(61)  | 1.410(12)  |
| O(17)-C(49)  | 1.452(8)   |
| O(18)-C(60)  | 1.412(5)   |
| O(18)-C(49)  | 1.451(4)   |
| O(19)-C(58)  | 1.411(4)   |
| O(19)-C(59)  | 1.432(4)   |
| C(3)-C(4)    | 1.331(4)   |
| C(49)-C(50)  | 1.501(4)   |
| C(51)-C(52)  | 1.493(4)   |
| C(53)-C(54)  | 1.496(4)   |
| C(55)-C(56)  | 1.509(4)   |
| C(57)-C(58)  | 1.481(4)   |
| C(59)-C(60)  | 1.497(5)   |
| C(59)-C(61)  | 1.614(11)  |

**Table S23. Crystal data and structure refinement for ajr46 (1-Gd).**

Identification code                                                          ajr46

|                                 |                                                                                                                         |
|---------------------------------|-------------------------------------------------------------------------------------------------------------------------|
| Empirical formula               | C36 H90 Gd K N5 O6 Si6                                                                                                  |
| Formula weight                  | 1053.99                                                                                                                 |
| Temperature                     | 88(2) K                                                                                                                 |
| Wavelength                      | 0.71073 Å                                                                                                               |
| Crystal system                  | Trigonal                                                                                                                |
| Space group                     | R32                                                                                                                     |
| Unit cell dimensions            | a = 18.564(3) Å $\alpha = 90^\circ$ .<br>b = 18.564(3) Å $\beta = 90^\circ$ .<br>c = 18.050(3) Å $\gamma = 120^\circ$ . |
| Volume                          | 5387(2) Å <sup>3</sup>                                                                                                  |
| Z                               | 3                                                                                                                       |
| Density (calculated)            | 0.975 Mg/m <sup>3</sup>                                                                                                 |
| Absorption coefficient          | 1.112 mm <sup>-1</sup>                                                                                                  |
| F(000)                          | 1668                                                                                                                    |
| Crystal color                   | Blue                                                                                                                    |
| Crystal size                    | 0.283 x 0.106 x 0.103 mm <sup>3</sup>                                                                                   |
| Theta range for data collection | 1.696 to 26.389°                                                                                                        |
| Index ranges                    | -23 ≤ h ≤ 23, -23 ≤ k ≤ 23, -22 ≤ l ≤ 22                                                                                |
| Reflections collected           | 13308                                                                                                                   |
| Independent reflections         | 2478 [R(int) = 0.0525]                                                                                                  |
| Completeness to theta = 25.500° | 100.0 %                                                                                                                 |
| Absorption correction           | Semi-empirical from equivalents                                                                                         |
| Max. and min. transmission      | 0.7454 and 0.6134                                                                                                       |
| Refinement method               | Full-matrix least-squares on F <sup>2</sup>                                                                             |
| Data / restraints / parameters  | 2478 / 0 / 88                                                                                                           |

|                                                 |                                    |
|-------------------------------------------------|------------------------------------|
| Goodness-of-fit on $F^2$                        | 1.005                              |
| Final R indices [ $I > 2\sigma(I)$ = 2264 data] | R1 = 0.0235, wR2 = 0.0411          |
| R indices (all data, 0.8 Å)                     | R1 = 0.0304, wR2 = 0.0426          |
| Absolute structure parameter                    | -0.026(6)                          |
| Extinction coefficient                          | n/a                                |
| Largest diff. peak and hole                     | 0.372 and -0.271 e.Å <sup>-3</sup> |

**Table S24. Bond lengths [Å] and angles [°] for ajr46 (1-Gd).**

---

|              |            |
|--------------|------------|
| Gd(1)-N(1)   | 2.315(3)   |
| Gd(1)-N(1)#1 | 2.316(3)   |
| Gd(1)-N(1)#2 | 2.316(3)   |
| Si(1)-N(1)   | 1.7059(18) |
| Si(1)-C(2)   | 1.875(3)   |
| Si(1)-C(1)   | 1.880(3)   |
| Si(1)-C(3)   | 1.886(3)   |
| N(1)-Si(1)#3 | 1.7059(18) |
| K(1)-O(1)#4  | 2.841(2)   |
| K(1)-O(1)#5  | 2.841(2)   |
| K(1)-O(1)#6  | 2.841(2)   |
| K(1)-O(1)#7  | 2.841(2)   |
| K(1)-O(1)    | 2.841(2)   |
| K(1)-O(1)#8  | 2.841(2)   |
| K(1)-N(2)#5  | 2.983(4)   |
| K(1)-N(2)    | 2.983(4)   |
| O(1)-C(6)    | 1.429(4)   |

|                     |            |
|---------------------|------------|
| O(1)-C(5)           | 1.433(4)   |
| N(2)-C(4)#6         | 1.475(3)   |
| N(2)-C(4)           | 1.475(3)   |
| N(2)-C(4)#8         | 1.475(3)   |
| C(4)-C(5)           | 1.494(5)   |
| C(6)-C(6)#5         | 1.481(7)   |
| N(1)-Gd(1)-N(1)#1   | 120.0      |
| N(1)-Gd(1)-N(1)#2   | 120.000(1) |
| N(1)#1-Gd(1)-N(1)#2 | 120.0      |
| N(1)-Si(1)-C(2)     | 113.49(12) |
| N(1)-Si(1)-C(1)     | 110.92(15) |
| C(2)-Si(1)-C(1)     | 106.80(15) |
| N(1)-Si(1)-C(3)     | 113.64(13) |
| C(2)-Si(1)-C(3)     | 106.05(16) |
| C(1)-Si(1)-C(3)     | 105.35(17) |
| Si(1)-N(1)-Si(1)#3  | 123.5(2)   |
| Si(1)-N(1)-Gd(1)    | 118.23(10) |
| Si(1)#3-N(1)-Gd(1)  | 118.23(10) |
| O(1)#4-K(1)-O(1)#5  | 98.09(6)   |
| O(1)#4-K(1)-O(1)#6  | 119.23(9)  |
| O(1)#5-K(1)-O(1)#6  | 137.51(9)  |
| O(1)#4-K(1)-O(1)#7  | 98.09(6)   |
| O(1)#5-K(1)-O(1)#7  | 98.09(6)   |
| O(1)#6-K(1)-O(1)#7  | 59.51(9)   |
| O(1)#4-K(1)-O(1)    | 137.51(9)  |

|                    |            |
|--------------------|------------|
| O(1)#5-K(1)-O(1)   | 59.52(9)   |
| O(1)#6-K(1)-O(1)   | 98.09(6)   |
| O(1)#7-K(1)-O(1)   | 119.23(9)  |
| O(1)#4-K(1)-O(1)#8 | 59.52(9)   |
| O(1)#5-K(1)-O(1)#8 | 119.24(9)  |
| O(1)#6-K(1)-O(1)#8 | 98.09(6)   |
| O(1)#7-K(1)-O(1)#8 | 137.51(9)  |
| O(1)-K(1)-O(1)#8   | 98.09(6)   |
| O(1)#4-K(1)-N(2)#5 | 60.70(4)   |
| O(1)#5-K(1)-N(2)#5 | 60.70(4)   |
| O(1)#6-K(1)-N(2)#5 | 119.30(4)  |
| O(1)#7-K(1)-N(2)#5 | 60.70(4)   |
| O(1)-K(1)-N(2)#5   | 119.30(4)  |
| O(1)#8-K(1)-N(2)#5 | 119.30(4)  |
| O(1)#4-K(1)-N(2)   | 119.30(4)  |
| O(1)#5-K(1)-N(2)   | 119.30(4)  |
| O(1)#6-K(1)-N(2)   | 60.70(4)   |
| O(1)#7-K(1)-N(2)   | 119.30(4)  |
| O(1)-K(1)-N(2)     | 60.70(4)   |
| O(1)#8-K(1)-N(2)   | 60.70(4)   |
| N(2)#5-K(1)-N(2)   | 180.0      |
| C(6)-O(1)-C(5)     | 111.5(2)   |
| C(6)-O(1)-K(1)     | 115.51(18) |
| C(5)-O(1)-K(1)     | 117.35(17) |
| C(4)#6-N(2)-C(4)   | 109.62(18) |

|                    |            |
|--------------------|------------|
| C(4)#6-N(2)-C(4)#8 | 109.62(18) |
| C(4)-N(2)-C(4)#8   | 109.62(18) |
| C(4)#6-N(2)-K(1)   | 109.32(18) |
| C(4)-N(2)-K(1)     | 109.32(18) |
| C(4)#8-N(2)-K(1)   | 109.32(18) |
| N(2)-C(4)-C(5)     | 114.5(3)   |
| O(1)-C(5)-C(4)     | 109.4(3)   |
| O(1)-C(6)-C(6)#5   | 109.7(3)   |

---

Symmetry transformations used to generate equivalent atoms:

#1  $-x+y, -x, z$  #2  $-y, x-y, z$  #3  $x-y, -y, -z+1$  #4  $x-y+1/3, -y+2/3, -z+2/3$

#5  $y+1/3, x-1/3, -z+2/3$  #6  $-y+1, x-y, z$  #7  $-x+4/3, -x+y+2/3, -z+2/3$

#8  $-x+y+1, -x+1, z$



## UV-Visible spectra

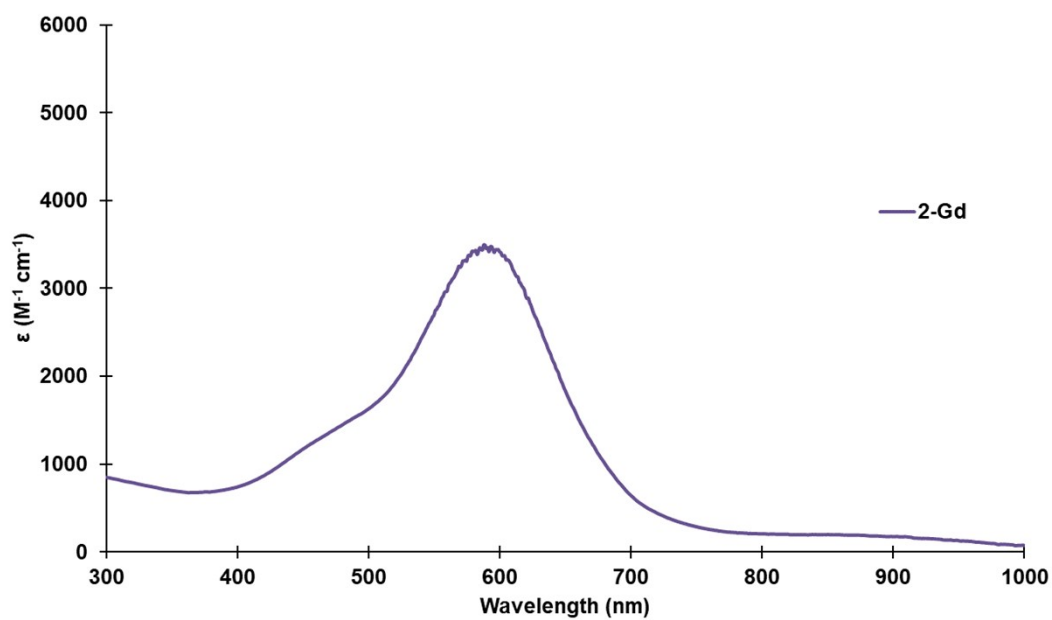

**Figure S11.** UV-visible spectrum of 2-Gd in Et<sub>2</sub>O

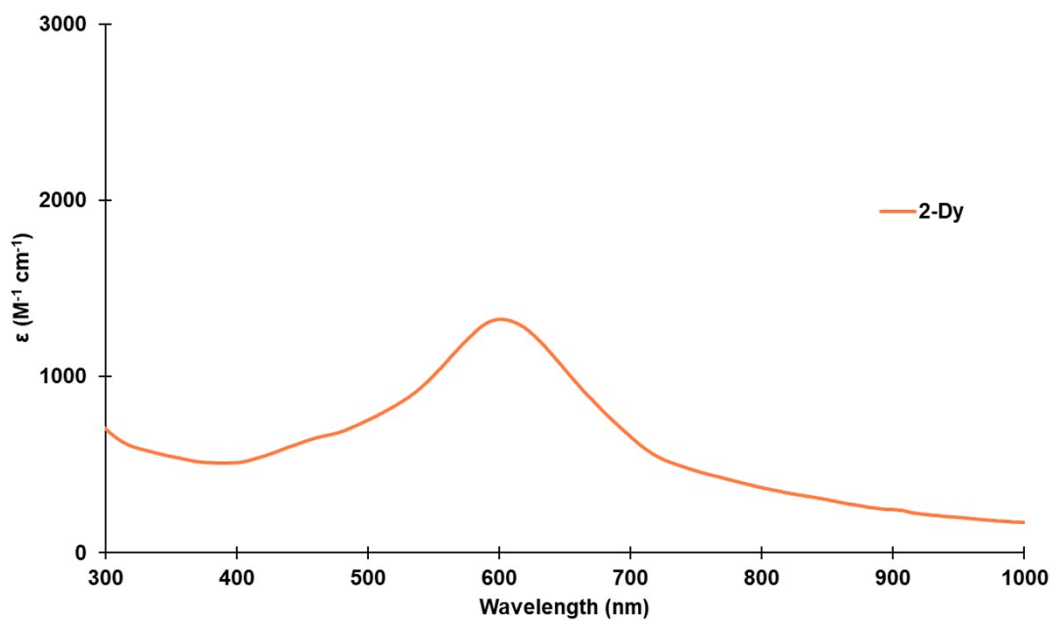

**Figure S12.** UV-visible spectrum of 2-Dy in Et<sub>2</sub>O

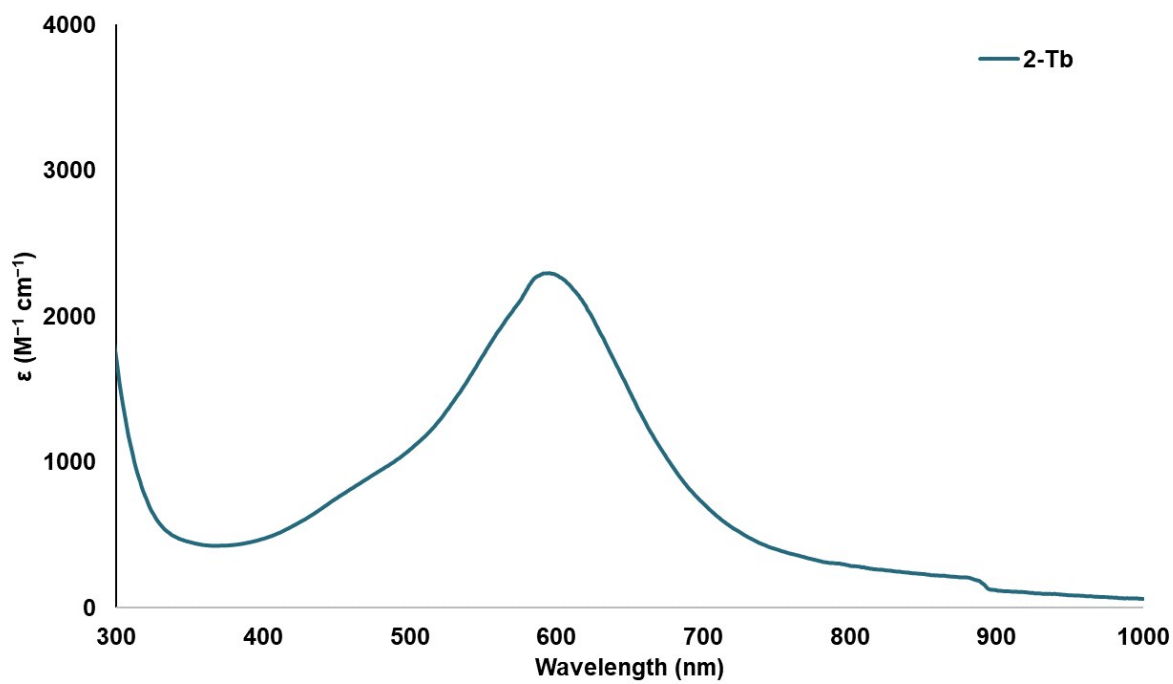

**Figure S13.** UV-visible spectrum of 2-Tb in Et<sub>2</sub>O

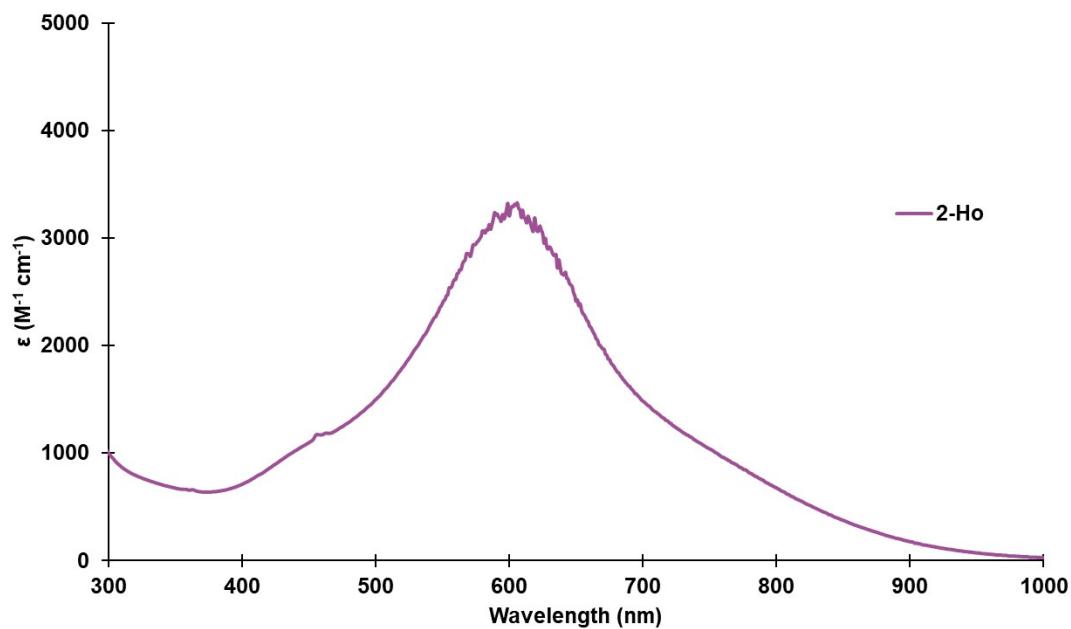

**Figure S14.** UV-visible spectrum of 2-Ho in Et<sub>2</sub>O

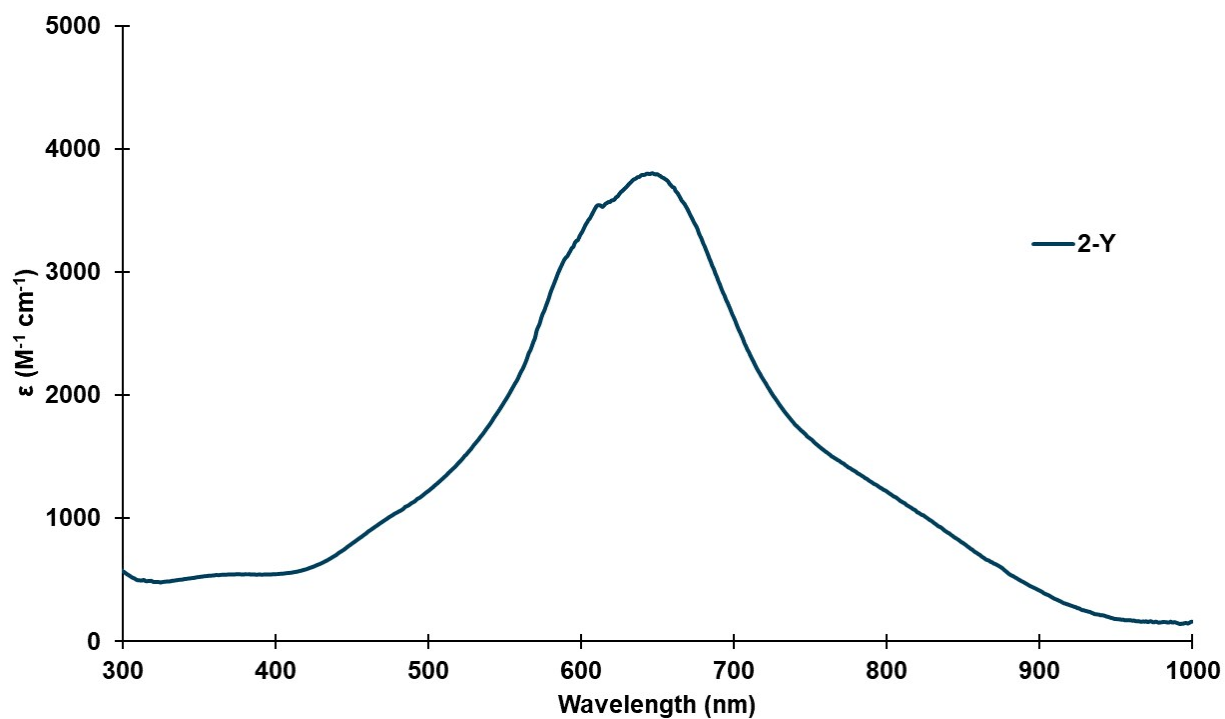

**Figure S15.** UV-visible spectrum of 2-Y in Et<sub>2</sub>O

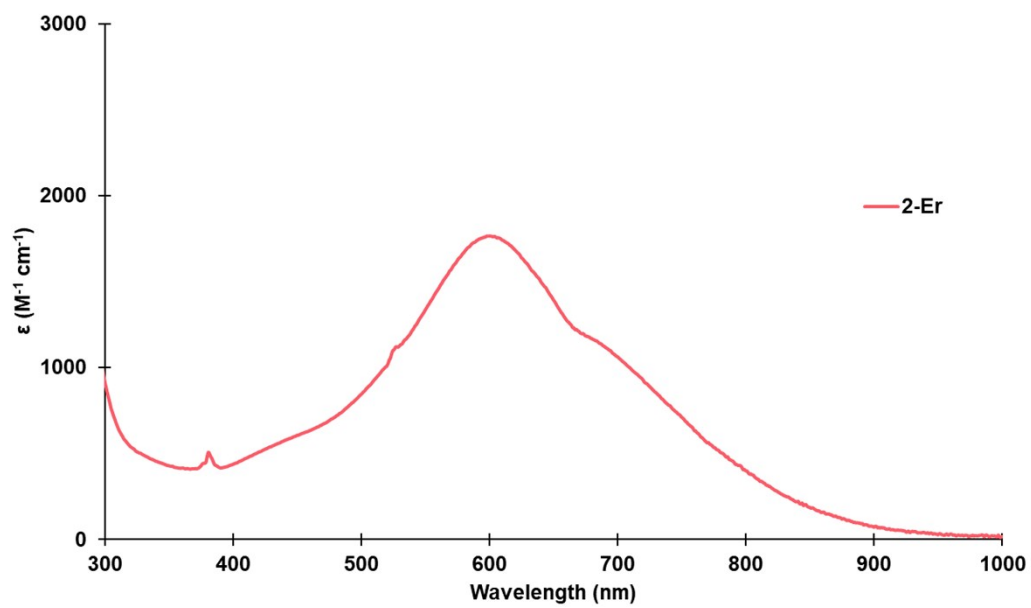

**Figure S16.** UV-visible spectrum of 2-Er in Et<sub>2</sub>O

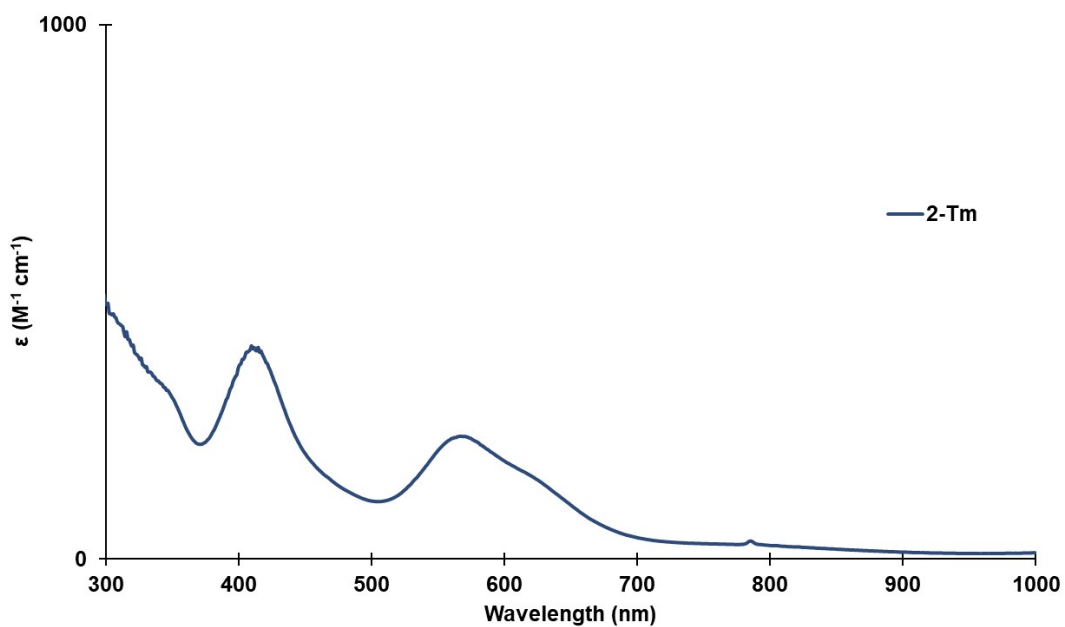

**Figure S17.** UV-visible spectrum of 2-Tm in Et<sub>2</sub>O

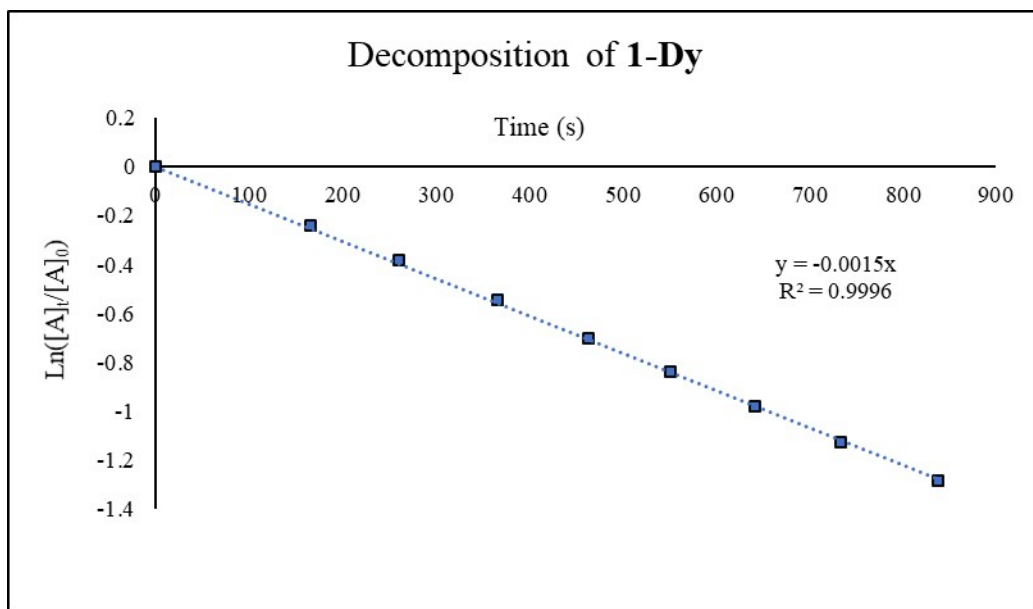

**Figure S18.** Decomposition of 1-Dy 3mM in THF

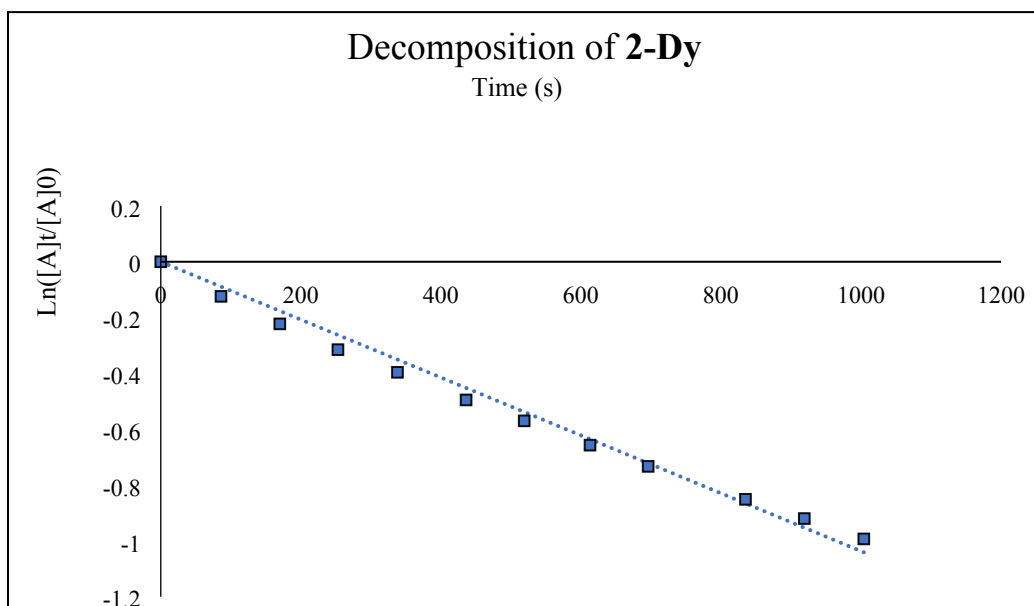

**Figure S19.** Decomposition of 2-Dy 3mM in Et<sub>2</sub>O

### H-Tube Schematic

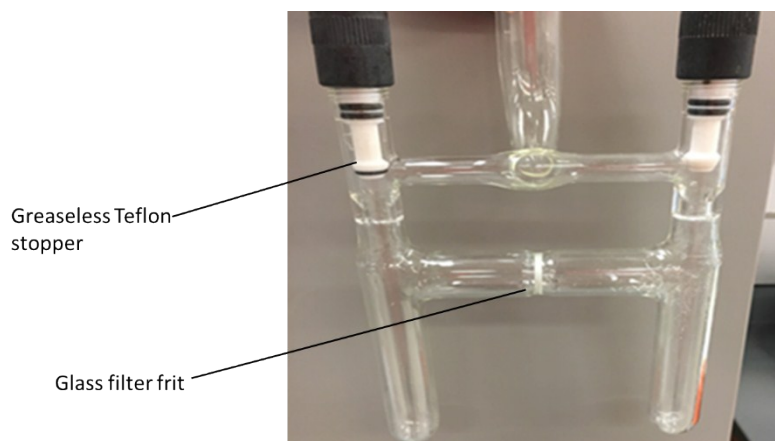

**Figure S20.** Schematic of H tube used in reactions to form **3-Ln** and **4-Ln**
